# Supplementary material for: Sustainable tandem acylation/Diels–Alder reaction toward versatile tricyclic epoxyisoindole-7-carboxylic acids in renewable green solvents
Source: publisher site journal article supplement (doi:10.3762/bjoc.20.114), 2024-06-06
Supplement: Additional file 1 [file 1860-5397-20-114-S1.pdf]

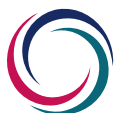

## Supporting Information

for

### **Sustainable tandem acylation/Diels–Alder reaction toward versatile tricyclic epoxyisoindole-7-carboxylic acids in renewable green solvents**

Ayhan Yıldırım

*Beilstein J. Org. Chem.* **2024**, *20*, 1308–1319. [doi:10.3762/bjoc.20.114](https://doi.org/10.3762/bjoc.20.114)

### **Tables S1 and S2, Cartesian coordinates of the optimized structures and copies of NMR spectra**

---

**Table of contents**

|                                                        |         |
|--------------------------------------------------------|---------|
| Table S1.....                                          | S2      |
| Table S2.....                                          | S3–S4   |
| References for Tables S1 and S2.....                   | S5–S6   |
| Characterization data.....                             | S7–S19  |
| <sup>1</sup> H NMR Spectra.....                        | S20–S35 |
| <sup>13</sup> C NMR Spectra.....                       | S36–S51 |
| Cartesian coordinates of the optimized structures..... | S52–S63 |

**Table S1:** Composition and physical parameters of the used vegetable oils, oleic acid and wax ester.

| Parameters (%)              | SSO | OO |
|-----------------------------|-----|----|
| Saturated fatty acids       | 14  | 16 |
| Monounsaturated fatty acids | 29  | 65 |
| Polyunsaturated fatty acids | 57  | 10 |
| Carbohydrate                | 0   | 0  |
| Protein                     | 0   | 0  |
| Salt                        | 0   | 0  |

---

OA

Technical grade: 90%

Vapour pressure 1 mmHg ( 176 °C)

Refractive index, n<sub>20/D</sub>: 1.459

Boiling point: 194-195 °C/1.2 mmHg

Melting point: 13-14 °C

Density: 0.887 g/mL at 25 °C

---

LM

Name: Lauryl myristate

Analytical grade

Melting point: 38–39 °C

Synthesized according to ref. [1]

---

**Table S2:** Literature methods given in literature for the cyclization of *N*-benzyl-1-(furan-2-yl)methanamine **1a** with maleic anhydride to afford **2a**.

| Entry | Solvent              | Temperature<br>(°C) | Time    | Product isolation                        | Yield<br>(%) | Ref. |
|-------|----------------------|---------------------|---------|------------------------------------------|--------------|------|
| 1     | benzene              | –                   | –       | recrystallization<br>(AcOH)              | 99.5         | [2]  |
| 2     | benzene              | rt                  | 48-72 h | filtration<br>washing<br>with<br>benzene | and 90       | [3]  |
| 3     | benzene              | rt                  | 10 h    | recrystallization<br>(hexane-EtOAc)      | 95           | [4]  |
| 4     | toluene              | MW, 60              | 10 min  | filtration<br>washing with ether         | and 76       | [5]  |
| 5     | benzene              | rt                  | 24 h    | filtration<br>washing<br>benzene-ether   | and 90       | [6]  |
| 6     | toluene              | rx                  | 5 h     | filtration<br>washing with ether         | and 86       | [7]  |
| 7     | THF<br>or<br>toluene | rx-rt               | 24 h    | filtration<br>washing with ether         | and -        | [8]  |
| 8     | diethyl<br>ether     | rt                  | 24 h    | filtration<br>washing with ether         | and -        | [9]  |
| 9     | toluene              | rt                  | 16 h    | recrystallization<br>(acetone)           | 55           | [10] |
| 10    | chloroform           | rt                  | 48 h    | filtration                               | and 75       | [11] |

|    |            |       |        |                                       |             |    |              |
|----|------------|-------|--------|---------------------------------------|-------------|----|--------------|
|    |            |       |        | washing with MeOH<br>or acetone       |             |    |              |
| 11 | chloroform | rt-rx | 7 h    | filtration<br>washing<br>acetone      | and<br>with | 80 | [12]         |
| 12 | SSO        | 50    | 30 min | filtration<br>washing<br>hexane-ether | and<br>with | 96 | this<br>work |
| 13 | OO         | 50    | 30 min | filtration<br>washing<br>hexane-ether | and<br>with | 96 | this<br>work |
| 14 | OA         | 50    | 30 min | filtration<br>washing<br>hexane-ether | and<br>with | 99 | this<br>work |
| 15 | LM         | 50    | 30 min | filtration<br>washing<br>hexane-ether | and<br>with | 99 | this<br>work |

---

**References for Tables S1 and S2**

1. Yıldırım, A.; Mudaber, S.; Öztürk, S. *Eur. J. Lipid Sci. Technol.* **2019**, *121*, 1800303. doi: 10.1002/ejlt.201800303
2. Takano S.; Oshima Y.; Ito F.; Ogasawara K. *Yakugaku Zasshi* **1980**, *100*, 1194–1202. doi: 10.1248/yakushi1947.100.12\_1194
3. Varlamov, A. V.; Boltukhina, E. V.; Zubkov, F. I.; Sidorenko, N. V.; Chernyshev, A. I.; Grudin, D. G. *Chem. Heterocycl. Compd.* **2004**, *40*, 22–28. doi: 10.1023/B:COHC.0000023763.75894.63
4. Sarang, P. S.; Yadava, A. A.; Patil, P. S.; Krishna, U. M.; Trivedi, G. K.; Salunkhe, M. M. *Synthesis* **2007**, *7*, 1091–1095. doi: 10.1055/s-2007-965950
5. Gordon, C. P.; Byrne, N.; McCluskey, A. *Green Chem.* **2010**, *12*, 1000–1006. doi: 10.1039/B924835H
6. Zubkov, F. I.; Airiyani, I. K.; Ershova, J. D.; Galeev, T. R.; Zaytsev, V. P.; Nikitina, E. V.; Varlamov, A. V. *RSC Adv.* **2012**, *2*, 4103–4109. doi: 10.1039/C2RA20295F
7. De Cesco, S.; Deslandes, S.; Therrien, E.; Levan, D.; Cueto, M.; Schmidt, R.; Cantin, L. D.; Mittermaier, A.; Jeanneret, L. J.; Moitessier, N. *J. Med. Chem.* **2012**, *55*, 6306–6315. doi: 10.1021/jm3002839
8. Papeo, G.; Posterl, H.; Borghi, D.; Busel, A. A.; Caprera, F.; Casale, E.; Ciomei, M.; Cirila, A.; Corti, E.; D'Anello, M.; Fasolini, M.; Forte, B.; Galvani, A.; Isacchi, A.; Khvat, A.; Krasavin, M. Y.; Lupi, R.; Orsini, P.; Perego, R.; Pesenti, E.; Pezzetta, D.; Rainoldi, S.; Sirtori, F. R.; Scolaro, .; Sola, F.; Zuccotto, F.; Felder, E. R.; Donati, D.; Montagnoli, A. *J. Med. Chem.* **2015**, *58*, 6875–6898. doi: 10.1021/acs.jmedchem.5b00680

9. Hizartzidis, L.; Gilbert, J.; Gordon, C. P.; Sakoff, J. A.; McCluskey, A. *ChemMedChem* **2019**, *14*, 1152–1161. doi: 10.1002/cmdc.201900180
10. Blanpain, A.; Clark, J. H.; Farmer, T. J.; Guo, Y.; Ingram, I. D. V.; Kendrick, J. E.; Lawrenson, S. B.; North, M.; Rodgers, G.; Whitwood, A. C. *ChemSusChem* **2019**, *12*, 2393–2401. doi: 10.1002/cssc.201900748
11. Naguib, M.; Rashed, A.; Keddie, D. J. *J. Mater. Sci.* **2021**, *56*, 8900–8909. doi: 10.1007/s10853-021-05853-x
12. Naguib, M.; Yassin, M. A. *ACS Appl. Polym. Mater.* **2022**, *4*, 2181–2188. doi: 10.1021/acsapm.2c00158

2-Benzyl-1-oxo-1,2,3,6,7,7a-hexahydro-3a,6-epoxyisoindole-7-carboxylic acid (**2a**)

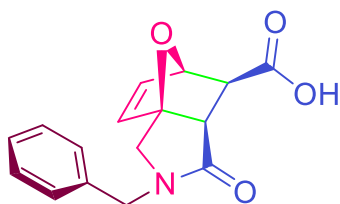

Beige crystalline solid, mp 171–172 °C (EtOAc/MeOH), (The analytical data of compound **2a** agree with the literature [6], lit. 170.3–171.8 °C); <sup>1</sup>H NMR (600 MHz, CDCl<sub>3</sub>) δ 7.33 (t, *J* = 7.6 Hz, 2H, Ar), 7.28 (d, *J* = 7.4 Hz, 1H, Ar), 7.24 (t, *J* = 7.4 Hz, 2H, Ar), 6.42-6.39 (m, 2H, H<sub>f</sub>, H<sub>g</sub>), 5.25 (d, *J* = 1.6 Hz, 1H, H<sub>c</sub>), 4.63 (d, *J* = 15.1 Hz, 1H, H<sub>h</sub>), 4.42 (d, *J* = 15.1 Hz, 1H, H<sub>i</sub>), 3.83 (d, *J* = 12 Hz, 1H, H<sub>d</sub>), 3.65 (d, *J* = 12 Hz, 1H, H<sub>e</sub>), 2.96 (d, *J* = 9.1 Hz, 1H, H<sub>a</sub>), 2.84 (d, *J* = 9.1 Hz, 1H, H<sub>b</sub>); <sup>13</sup>C NMR (150 MHz, CDCl<sub>3</sub>) δ 173.10, 172.51, 137.22, 135.20, 134.83, 128.92, 127.98, 127.87, 88.79, 82.36, 50.72, 48.53, 47.03, 45.86; Anal calc for C<sub>16</sub>H<sub>15</sub>NO<sub>4</sub> (285.30): C 67.36, H 5.30, N 4.91. Found: C 67.30, H 5.26, N 4.86.

[6] Zubkov, F. I.; Airiyan, I. K.; Ershova, J. D.; Galeev, T. R.; Zaytsev, V. P.; Nikitina, E. V.; Varlamov, A. V. *RSC Adv.* **2012**, 2, 4103–4109. doi: 10.1039/C2RA20295F



2-Octyl-1-oxo-1,2,3,6,7,7a-hexahydro-3a,6-epoxyisoindole-7-carboxylic acid (**2b**)

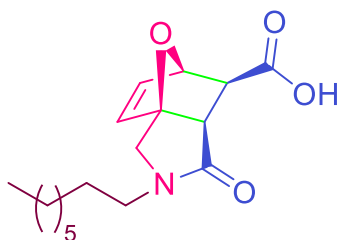

Beige crystalline solid, mp 119–120 °C (EtOAc/MeOH);  $^1\text{H}$  NMR (600 MHz,  $\text{CDCl}_3$ )  $\delta$  6.47 (s, 2H,  $\text{H}_f$ ,  $\text{H}_g$ ), 5.28 (s, 1H,  $\text{H}_c$ ), 3.98 (d,  $J = 11.9$  Hz, 1H,  $\text{H}_d$ ), 3.73 (d,  $J = 11.9$  Hz, 1H,  $\text{H}_e$ ), 3.44-3.40 (m, 1H,  $\text{H}_h$ ), 3.24-3.19 (m, 1H,  $\text{H}_i$ ), 2.89 (d,  $J = 9.1$  Hz, 1H,  $\text{H}_a$ ), 2.82 (d,  $J = 9.1$  Hz, 1H,  $\text{H}_b$ ), 1.52 (quin,  $J = 7.6$  Hz, 2H,  $-\text{NCH}_2\text{CH}_2\text{CH}_2-$ ), 1.27-1.23 (m, 10H,  $5\text{CH}_2$ ), 0.85 (t,  $J = 7.2$  Hz, 3H,  $-\text{CH}_3$ );  $^{13}\text{C}$  NMR (150 MHz,  $\text{CDCl}_3$ )  $\delta$  172.88, 172.52, 137.30, 134.77, 88.94, 82.49, 50.51, 49.00, 46.05, 43.25, 31.73, 29.14, 29.10, 27.02, 26.62, 22.58, 14.04; Anal calc for  $\text{C}_{17}\text{H}_{25}\text{NO}_4$  (307.39): C 66.43, H 8.20, N 4.56. Found: C 66.38, H 8.28, N 4.47.

2-Decyl-1-oxo-1,2,3,6,7,7a-hexahydro-3a,6-epoxyisoindole-7-carboxylic acid (**2c**)

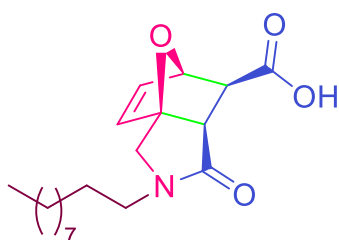

Beige crystalline solid, mp 103–104 °C (EtOAc/MeOH);  $^1\text{H}$  NMR (600 MHz,  $\text{CDCl}_3$ )  $\delta$  6.47 (s, 2H,  $\text{H}_f$ ,  $\text{H}_g$ ), 5.29 (s, 1H,  $\text{H}_c$ ), 3.98 (d,  $J = 11.9$  Hz, 1H,  $\text{H}_d$ ), 3.73 (d,  $J = 11.9$  Hz, 1H,  $\text{H}_e$ ), 3.44-3.40 (m, 1H,  $\text{H}_h$ ), 3.24-3.19 (m, 1H,  $\text{H}_i$ ), 2.89 (d,  $J = 9.1$  Hz, 1H,  $\text{H}_a$ ), 2.83 (d,  $J = 9.1$  Hz, 1H,  $\text{H}_b$ ), 1.52 (quin,  $J = 7.2$  Hz, 2H,  $-\text{NCH}_2\text{CH}_2\text{CH}_2-$ ), 1.27-1.23 (m, 14H,  $7\text{CH}_2$ ), 0.86 (t,  $J = 7.4$  Hz, 3H,  $-\text{CH}_3$ );  $^{13}\text{C}$  NMR (150 MHz,  $\text{CDCl}_3$ )  $\delta$  172.89,

172.52, 137.30, 134.77, 88.94, 82.49, 50.51, 49.00, 46.05, 43.25, 31.84, 29.49, 29.45, 29.25, 29.19, 27.03, 26.63, 22.63, 14.07; Anal calc for C<sub>19</sub>H<sub>29</sub>NO<sub>4</sub> (335.44): C 68.03, H 8.71, N 4.18. Found: C 68.08, H 8.64, N 4.23.

*2-Dodecyl-1-oxo-1,2,3,6,7,7a-hexahydro-3a,6-epoxyisoindole-7-carboxylic acid (2d)*

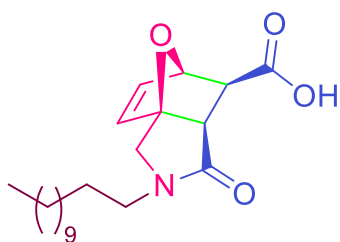

Beige crystalline solid, mp 103.5–104 °C (EtOAc/MeOH); <sup>1</sup>H NMR (600 MHz, CDCl<sub>3</sub>) δ 6.46 (s, 2H, H<sub>f</sub>, H<sub>g</sub>), 5.27 (s, 1H, H<sub>c</sub>), 3.98 (d, *J* = 11.9 Hz, 1H, H<sub>d</sub>), 3.74 (d, *J* = 11.9 Hz, 1H, H<sub>e</sub>), 3.46-3.39 (m, 1H, H<sub>h</sub>), 3.23-3.17 (m, 1H, H<sub>i</sub>), 2.89 (d, *J* = 9.1 Hz, 1H, H<sub>a</sub>), 2.83 (d, *J* = 9.1 Hz, 1H, H<sub>b</sub>), 1.52 (quin, *J* = 7.2 Hz, 2H, -NCH<sub>2</sub>CH<sub>2</sub>CH<sub>2</sub>-), 1.28-1.22 (m, 18H, 9CH<sub>2</sub>), 0.85 (t, *J* = 7.4 Hz, 3H, -CH<sub>3</sub>); <sup>13</sup>C NMR (150 MHz, CDCl<sub>3</sub>) δ 173.12, 172.47, 137.25, 134.81, 88.90, 82.41, 50.64, 48.99, 45.91, 43.26, 31.87, 29.60, 29.59, 29.55, 29.45, 29.30, 29.21, 27.04, 26.65, 22.64, 14.07; Anal calc for C<sub>21</sub>H<sub>33</sub>NO<sub>4</sub> (363.50): C 69.39, H 9.15, N 3.85. Found: C 69.45, H 9.09, N 3.91.

*2-Tetradecyl-1-oxo-1,2,3,6,7,7a-hexahydro-3a,6-epoxyisoindole-7-carboxylic acid*  
**(2e)**

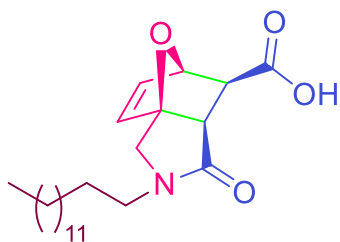

Beige crystalline solid, mp 112–113 °C (EtOAc/MeOH);  $^1\text{H}$  NMR (600 MHz,  $\text{CDCl}_3$ )  $\delta$  6.47 (s, 2H,  $\text{H}_f$ ,  $\text{H}_g$ ), 5.31 (s, 1H,  $\text{H}_c$ ), 3.98 (d,  $J = 11.9$  Hz, 1H,  $\text{H}_d$ ), 3.74 (d,  $J = 11.9$  Hz, 1H,  $\text{H}_e$ ), 3.45–3.40 (m, 1H,  $\text{H}_h$ ), 3.25–3.20 (m, 1H,  $\text{H}_i$ ), 2.89 (d,  $J = 9.1$  Hz, 1H,  $\text{H}_a$ ), 2.84 (d,  $J = 9.1$  Hz, 1H,  $\text{H}_b$ ), 1.53 (quin,  $J = 7.2$  Hz, 2H,  $-\text{NCH}_2\text{CH}_2\text{CH}_2-$ ), 1.27–1.23 (m, 22H, 11 $\text{CH}_2$ ), 0.86 (t,  $J = 7.2$  Hz, 3H,  $-\text{CH}_3$ );  $^{13}\text{C}$  NMR (150 MHz,  $\text{CDCl}_3$ )  $\delta$  172.73, 172.57, 137.37, 134.70, 88.99, 82.57, 50.39, 49.02, 46.21, 43.27, 31.89, 29.66, 29.64, 29.61, 29.56, 29.46, 29.32, 29.20, 27.03, 26.64, 22.65, 14.08; Anal calc for  $\text{C}_{23}\text{H}_{37}\text{NO}_4$  (391.55): C 70.55, H 9.53, N 3.58. Found: C 70.50, H 9.48, N 3.66.

*2-Hexadecyl-1-oxo-1,2,3,6,7,7a-hexahydro-3a,6-epoxyisoindole-7-carboxylic acid*  
**(2f)**

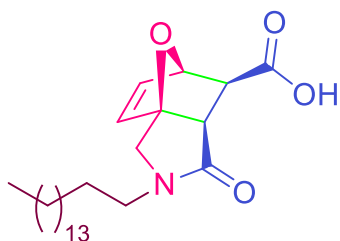

Beige crystalline solid, mp 114–115 °C (EtOAc/MeOH);  $^1\text{H}$  NMR (600 MHz,  $\text{CDCl}_3$ )  $\delta$  6.47 (s, 2H,  $\text{H}_f$ ,  $\text{H}_g$ ), 5.31 (s, 1H,  $\text{H}_c$ ), 3.98 (d,  $J = 11.9$  Hz, 1H,  $\text{H}_d$ ), 3.74 (d,  $J = 11.9$  Hz, 1H,  $\text{H}_e$ ), 3.45–3.40 (m, 1H,  $\text{H}_h$ ), 3.25–3.20 (m, 1H,  $\text{H}_i$ ), 2.89 (d,  $J = 9.1$  Hz, 1H,  $\text{H}_a$ ),

2.84 (*d*,  $J = 9.1$  Hz, 1H, H<sub>b</sub>), 1.53 (*quin*,  $J = 7.2$  Hz, 2H, -NCH<sub>2</sub>CH<sub>2</sub>CH<sub>2</sub>-), 1.27-1.23 (*m*, 26H, 13CH<sub>2</sub>), 0.86 (*t*,  $J = 7.2$  Hz, 3H, -CH<sub>3</sub>); <sup>13</sup>C NMR (150 MHz, CDCl<sub>3</sub>)  $\delta$  172.68, 172.58, 137.39, 134.67, 89.00, 82.60, 50.35, 49.02, 46.26, 43.28, 31.89, 29.66, 29.63, 29.61, 29.56, 29.46, 29.33, 29.20, 27.03, 26.64, 22.65, 14.08; Anal calc for C<sub>25</sub>H<sub>41</sub>NO<sub>4</sub> (419.61): C 71.56, H 9.85, N 3.34. Found: C 71.50, H 9.80, N 3.29.

2-(3-(Diethylamino)propyl)-1-oxo-1,2,3,6,7,7a-hexahydro-3a,6-epoxyisoindole-7-carboxylic acid (**2g**)

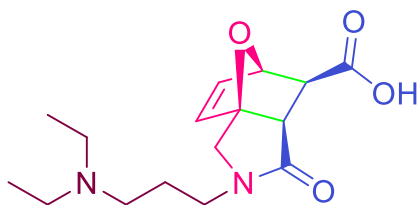

Orange oily liquid; <sup>1</sup>H NMR (600 MHz, DMSO-d<sub>6</sub>)  $\delta$  6.53 (*d*,  $J = 5.9$  Hz, 1H, H<sub>f</sub>), 6.39 (*d*,  $J = 5.9$  Hz, 1H, H<sub>g</sub>), 4.91 (*s*, 1H, H<sub>c</sub>), 3.96 (*d*,  $J = 11.6$  Hz, 1H, H<sub>d</sub>), 3.54 (*d*,  $J = 11.6$  Hz, 1H, H<sub>e</sub>), 3.22-3.19 (*m*, 1H, H<sub>h</sub>), 3.16-3.12 (*m*, 1H, H<sub>i</sub>), 2.67 (*d*,  $J = 9.2$  Hz, 1H, H<sub>a</sub>), 2.46 (*q*, 4H,  $J = 13.2$  Hz, -NCH<sub>2</sub>CH<sub>2</sub>CH<sub>2</sub>N(CH<sub>2</sub>CH<sub>3</sub>)<sub>2</sub>), 2.40 (*d*,  $J = 9.2$  Hz, 1H, H<sub>b</sub>), 1.59 (*t*,  $J = 7.4$  Hz, 2H, -NCH<sub>2</sub>CH<sub>2</sub>CH<sub>2</sub>N(CH<sub>2</sub>CH<sub>3</sub>)<sub>2</sub>), 1.02 (*quin*, 2H,  $J = 7.2$  Hz, -NCH<sub>2</sub>CH<sub>2</sub>CH<sub>2</sub>N(CH<sub>2</sub>CH<sub>3</sub>)<sub>2</sub>), 0.95 (*t*,  $J = 7.3$  Hz, 6H, -NCH<sub>2</sub>CH<sub>2</sub>CH<sub>2</sub>N(CH<sub>2</sub>CH<sub>3</sub>)<sub>2</sub>); <sup>13</sup>C NMR (150 MHz, DMSO-d<sub>6</sub>)  $\delta$  172.68, 172.58, 137.39, 134.67, 89.00, 82.60, 56.47, 50.62, 49.58, 48.14, 46.42, 45.29, 24.06, 18.96, 11.20; Anal calc for C<sub>16</sub>H<sub>24</sub>N<sub>2</sub>O<sub>4</sub> (308.38): C 62.32, H 7.84, N 9.08. Found: C 62.28, H 7.90, N 9.13.

*2-(2-Hydroxybenzyl)-1-oxo-1,2,3,6,7,7a-hexahydro-3a,6-epoxyisoindole-7-carboxylic acid (2h)*

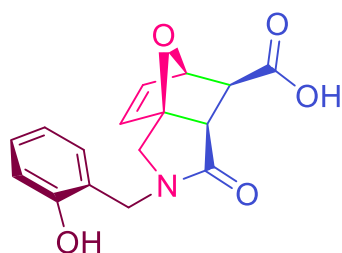

White crystalline solid, mp 103–104 °C (EtOAc/MeOH);  $^1\text{H}$  NMR (600 MHz,  $\text{CDCl}_3$ )  $\delta$  7.19 (t,  $J = 9.7$  Hz, 1H, Ar), 7.11 (d,  $J = 9.7$  Hz, 1H, Ar), 6.92 (d,  $J = 7.5$  Hz, 1H, Ar), 6.82 (t,  $J = 7.5$  Hz, 1H, Ar), 6.44 (d,  $J = 5.9$  Hz, 1H,  $\text{H}_g$ ), 6.41 (dd,  $J_1 = 5.9$  Hz,  $J_2 = 1.7$  Hz, 1H,  $\text{H}_f$ ), 5.20 (d,  $J = 1.7$  Hz, 1H,  $\text{H}_c$ ), 4.75 (d,  $J = 14.9$  Hz, 1H,  $\text{H}_h$ ), 4.12 (d,  $J = 14.9$  Hz, 1H,  $\text{H}_i$ ), 3.97 (d,  $J = 12$  Hz, 1H,  $\text{H}_d$ ), 3.79 (d,  $J = 12$  Hz, 1H,  $\text{H}_e$ ), 2.86 (d,  $J = 9.1$  Hz, 1H,  $\text{H}_a$ ), 2.78 (d,  $J = 9.1$  Hz, 1H,  $\text{H}_b$ );  $^{13}\text{C}$  NMR (150 MHz,  $\text{CDCl}_3$ )  $\delta$  174.36, 173.41, 155.53, 136.89, 135.17, 130.81, 130.21, 121.30, 119.95, 117.49, 88.82, 82.13, 51.32, 49.32, 45.07, 44.07; Anal calc for  $\text{C}_{16}\text{H}_{15}\text{NO}_5$  (301.30): C 63.78, H 5.02, N 4.65. Found: C 63.84, H 5.07, N 4.59.

1-Oxo-2-(pyridin-3-ylmethyl)-1,2,3,6,7,7a-hexahydro-3a,6-epoxyisoindole-7-carboxylic acid (**2i**)

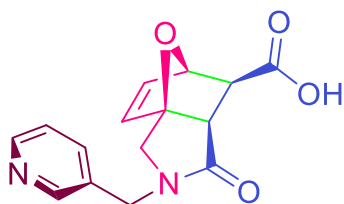

Yellowish solid, mp 183–184 °C (dec.) (EtOAc/MeOH);  $^1\text{H}$  NMR (600 MHz,  $\text{CDCl}_3$ )  $\delta$  8.58-8.56 (*m*, 2H, Py), 7.64 (*d*,  $J = 5.7$  Hz, 1H, Py), 7.32-7.30 (*m*, 1H, Py), 6.47 (*d*,  $J = 2.6$  Hz, 2H, H<sub>f</sub>, H<sub>g</sub>), 5.29 (*d*,  $J = 1.4$  Hz, 1H, H<sub>c</sub>), 4.67 (*d*,  $J = 15.4$  Hz, 1H, H<sub>h</sub>), 4.44 (*d*,  $J = 15.4$  Hz, 1H, H<sub>i</sub>), 3.91 (*d*,  $J = 11.8$  Hz, 1H, H<sub>d</sub>), 3.66 (*d*,  $J = 11.8$  Hz, 1H, H<sub>e</sub>), 2.87 (*d*,  $J = 9.1$  Hz, 1H, H<sub>a</sub>), 2.83 (*d*,  $J = 9.1$  Hz, 1H, H<sub>b</sub>);  $^{13}\text{C}$  NMR (150 MHz,  $\text{CDCl}_3$ )  $\delta$  172.93, 172.22, 148.58, 137.28, 136.28, 134.74, 131.62, 128.31, 124.06, 88.77, 82.32, 50.48, 48.52, 46.02, 44.31; Anal calc for  $\text{C}_{15}\text{H}_{14}\text{N}_2\text{O}_4$  (286.29): C 62.93, H 4.93, N 9.79. Found: C 62.88, H 4.98, N 9.85.

2-(Furan-2-ylmethyl)-1-oxo-1,2,3,6,7,7a-hexahydro-3a,6-epoxyisoindole-7-carboxylic acid (**2j**)

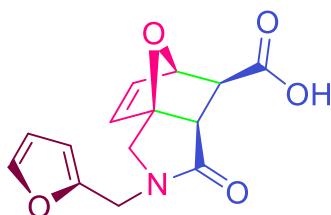

Beige crystalline solid, mp 148–150 °C (EtOAc/MeOH), (The analytical data of compound **2j** agree with the literature [13], lit. 150–151 °C); <sup>1</sup>H NMR (600 MHz, CDCl<sub>3</sub>) δ 7.35 (*dd*,  $J_1 = 1.9$  Hz,  $J_2 = 0.9$  Hz, 1H, Furyl), 6.44 (*m*, 2H, H<sub>f</sub>, H<sub>g</sub>), 6.31 (*dd*,  $J_1 = 3.2$  Hz,  $J_2 = 1.8$  Hz, 1H, Furyl), 6.28 (*dd*,  $J_1 = 3.2$  Hz,  $J_2 = 0.9$  Hz, 1H, Furyl), 5.24 (*d*,  $J = 1.6$  Hz, 1H, H<sub>c</sub>), 4.75 (*d*,  $J = 15.5$  Hz, 1H, H<sub>h</sub>), 4.26 (*d*,  $J = 15.5$  Hz, 1H, H<sub>i</sub>), 3.92 (*d*,  $J = 12$  Hz, 1H, H<sub>d</sub>), 3.76 (*d*,  $J = 12$  Hz, 1H, H<sub>e</sub>), 2.90 (*d*,  $J = 9.1$  Hz, 1H, H<sub>a</sub>), 2.81 (*d*,  $J = 9.1$  Hz, 1H, H<sub>b</sub>); <sup>13</sup>C NMR (150 MHz, CDCl<sub>3</sub>) δ 173.47, 172.04, 149.06, 142.67, 137.15, 134.95, 110.58, 108.84, 88.72, 82.23, 50.72, 48.92, 45.60, 39.86; Anal calc for C<sub>14</sub>H<sub>13</sub>NO<sub>5</sub> (275.26): C 61.09, H 4.76, N 5.09. Found: C 61.03, H 4.81, N 5.16.

[13] Zaytsev, V. P.; Mikhailova, N. M.; Airiyan, I. K.; Galkina, E. V.; Golubev, V. D.; Nikitina, E. V.; Zubkov, F. I; Varlamov, A. V. *Chem. Heterocycl. Compd.* **2012**, *48*, 505–513. doi: 10.1007/s10593-012-1023-1

1-Oxo-2-(*p*-tolyl)-1,2,3,6,7,7a-hexahydro-3a,6-epoxyisoindole-7-carboxylic acid (**2k**)

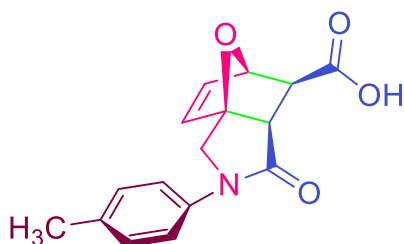

White crystalline solid, mp 188–190 °C (EtOAc/MeOH), (The analytical data of compound **2k** agree with the literature [14], lit. 183–184 °C);  $^1\text{H}$  NMR (600 MHz,  $\text{CDCl}_3$ )  $\delta$  7.43 (*d*,  $J = 8.5$  Hz, 2H, Ar), 7.18 (*d*,  $J = 8.5$  Hz, 2H, Ar), 6.56 (*d*,  $J = 1$  Hz, 2H, H<sub>f</sub>, H<sub>g</sub>), 5.41 (*s*, 1H, H<sub>c</sub>), 4.47 (*d*,  $J = 11.8$  Hz, 1H, H<sub>d</sub>), 4.21 (*d*,  $J = 11.8$  Hz, 1H, H<sub>e</sub>), 3.05 (*d*,  $J = 9.1$  Hz, 1H, H<sub>a</sub>), 2.95 (*d*,  $J = 9.1$  Hz, 1H, H<sub>b</sub>), 2.33 (*s*, 3H, CH<sub>3</sub>);  $^{13}\text{C}$  NMR (150 MHz,  $\text{CDCl}_3$ )  $\delta$  171.97, 171.42, 144.52, 137.49, 135.70, 134.63, 129.58, 121.01, 88.30, 82.74, 51.14, 50.76, 46.88, 20.09; Anal calc for  $\text{C}_{16}\text{H}_{15}\text{NO}_4$  (285.10): C 67.36, H 5.30, N 4.91. Found: C 67.41, H 5.25, N 4.85.

[14] Bilović, D. *Croat. Chem. Acta* **1966**, 38, 293–298. doi:

<https://hrcak.srce.hr/208149>



2-(4-Ethoxyphenyl)-1-oxo-1,2,3,6,7,7a-hexahydro-3a,6-epoxyisoindole-7-carboxylic acid (**2l**)

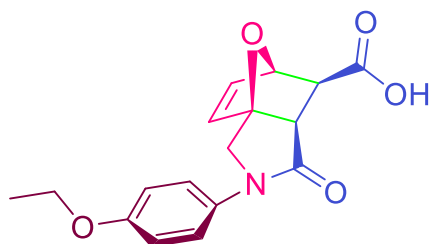

White crystalline solid, mp 171–172 °C (EtOAc/MeOH);  $^1\text{H}$  NMR (600 MHz, DMSO- $d_6$ )  $\delta$  7.51 (*d*,  $J$  = 9.1 Hz, 2H, Ar), 6.90 (*d*,  $J$  = 9.1 Hz, 2H, Ar), 6.61 (*d*,  $J$  = 5.6 Hz, 1H, H<sub>g</sub>), 6.45 (*dd*,  $J_1$  = 5.6 Hz,  $J_2$  = 1.7 Hz, 1H, H<sub>f</sub>), 5.01 (*d*,  $J_1$  = 1.7 Hz, 1H, H<sub>c</sub>), 4.48 (*d*,  $J$  = 12 Hz, 1H, H<sub>d</sub>), 3.99 (*d*,  $J$  = 12 Hz, 1H, H<sub>e</sub>), 4.00-3.96 (*m*, 2H, -OCH<sub>2</sub>CH<sub>3</sub>), 3.00 (*d*,  $J$  = 9.1 Hz, 1H, H<sub>a</sub>), 2.54 (*d*,  $J$  = 9.1 Hz, 1H, H<sub>b</sub>), 1.28 (*t*,  $J$  = 7.1 Hz, 3H, -OCH<sub>2</sub>CH<sub>3</sub>);  $^{13}\text{C}$  NMR (150 MHz, DMSO- $d_6$ )  $\delta$  173.39, 170.30, 155.45, 137.36, 135.87, 133.05, 121.54, 114.77, 87.85, 81.75, 63.58, 51.78, 49.88, 45.60, 15.08; Anal calc for C<sub>17</sub>H<sub>17</sub>NO<sub>5</sub> (315.33): C 64.75, H 5.43, N 4.44. Found: C 64.70, H 5.38, N 4.50.

1-Oxo-2-phenethyl-1,2,3,6,7,7a-hexahydro-3a,6-epoxyisoindole-7-carboxylic acid  
(2m)

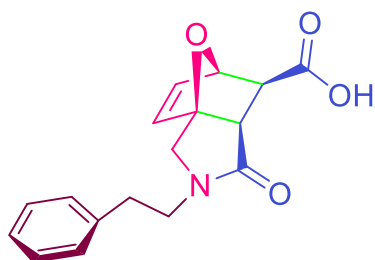

Beige crystalline solid, mp 116–117 °C (EtOAc/MeOH), (lit. 89–90 °C, ref.[4];  $^1\text{H}$  NMR (600 MHz,  $\text{CDCl}_3$ )  $\delta$  7.28 (t,  $J = 7.6$  Hz, 2H, Ar), 7.22-7.19 (d,  $J = 7.4$  Hz, 3H, Ar), 6.42-6.39 (m, 2H,  $\text{H}_f$ ,  $\text{H}_g$ ), 5.24 (d,  $J = 1.7$  Hz, 1H,  $\text{H}_c$ ), 3.77 (d,  $J = 13.9$  Hz, 1H,  $\text{H}_h$ ), 3.62 (d,  $J = 13.9$  Hz, 1H,  $\text{H}_i$ ), 3.74-3.69 (m, 1H,  $\text{H}_d$ ), 3.45-3.40 (m, 1H,  $\text{H}_e$ ), 2.91-2.81 (m, 2H,  $-\text{CH}_2\text{CH}_2\text{Ph}$ ), 2.96 (d,  $J = 9.1$  Hz, 1H,  $\text{H}_a$ ), 2.84 (d,  $J = 9.1$  Hz, 1H,  $\text{H}_b$ );  $^{13}\text{C}$  NMR (150 MHz,  $\text{CDCl}_3$ )  $\delta$  173.19, 172.47, 138.30, 137.11, 134.91, 128.71, 128.66, 126.63, 88.87, 82.29, 50.68, 49.74, 45.71, 44.86, 33.54; Anal calc for  $\text{C}_{17}\text{H}_{17}\text{NO}_4$  (299.33): C 68.22, H 5.72, N 4.68. Found: C 68.17, H 5.76, N 4.74.

7-Carboxy-1-oxo-1,6,7,7a-tetrahydro-3a,6-epoxyisoindol-2(3H)-yl)hexyl)-1-oxo-1,2,3,6,7,7a-hexahydro-3a,6-epoxyisoindole-7-carboxylic acid (2n)

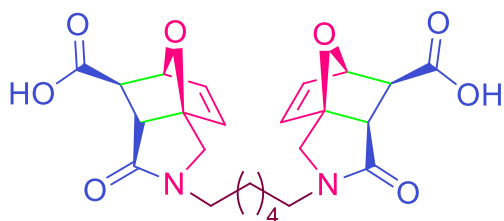

Orange solid, mp 68–69 °C;  $^1\text{H}$  NMR (600 MHz,  $\text{DMSO}-d_6$ )  $\delta$  6.55-6.53 (m, 2H,  $\text{H}_g$ ), 6.40-6.38 (m, 2H,  $\text{H}_f$ ), 4.93 (s, 2H,  $\text{H}_c$ ), 3.95 (d,  $J = 11.7$  Hz, 2H,  $\text{H}_d$ ), 3.83 (d,  $J = 11.9$  Hz, 2H,  $\text{H}_e$ ), 3.53-3.50 (m, 2H,  $\text{H}_h$ ), 3.26-3.16 (m, 2H,  $\text{H}_i$ ), 3.12-3.03 (m, 2H,  $\text{H}_a$ ), 2.75-

2.70 (*m*, 2H, H<sub>b</sub>), 1.45-1.38 (*m*, 4H, 2CH<sub>2</sub>), 1.27-1.19 (*m*, 4H, 2CH<sub>2</sub>); <sup>13</sup>C NMR (150 MHz, DMSO-d<sub>6</sub>) δ 173.44, 170.70, 137.09, 136.10, 88.80, 81.52, 50.64, 47.96, 44.98, 26.96, 25.99, 25.84; Anal calc for C<sub>24</sub>H<sub>28</sub>N<sub>2</sub>O<sub>8</sub> (472.49): C 61.01, H 5.97, N 5.93. Found: C 61.08, H 5.90, N 5.86.

*7-Carboxy-1-oxo-1,6,7,7a-tetrahydro-3a,6-epoxyisoindol-2(3H)-yl)octyl)-1-oxo-1,2,3,6,7,7a-hexahydro-3a,6-epoxyisoindole-7-carboxylic acid (2o)*

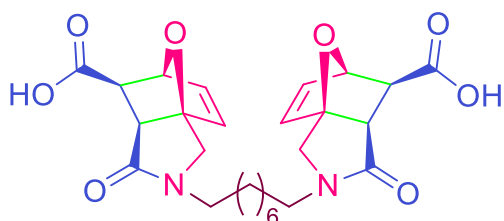

Orange solid, mp 66–67 °C; <sup>1</sup>H NMR (600 MHz, DMSO-d<sub>6</sub>) δ 6.54 (*d*, *J* = 5.7 Hz, 2H, H<sub>g</sub>), 6.39 (*dd*, *J*<sub>1</sub> = 5.7 Hz, *J*<sub>2</sub> = 1.8 Hz, 2H, H<sub>f</sub>), 4.93 (*d*, *J* = 1.7 Hz, 2H, H<sub>c</sub>), 3.99 (*d*, *J* = 11.7 Hz, 2H, H<sub>d</sub>), 3.95 (*d*, *J* = 11.9 Hz, 2H, H<sub>e</sub>), 3.51 (*d*, *J* = 11.7 Hz, 2H, H<sub>h</sub>), 3.25-3.20 (*m*, 2H, H<sub>i</sub>), 3.07-3.02 (*m*, 2H, H<sub>a</sub>), 2.72 (*d*, *J* = 9.1 Hz, 2H, H<sub>b</sub>), 1.43-1.39 (*m*, 4H, 2CH<sub>2</sub>), 1.27-1.18 (*m*, 8H, 4CH<sub>2</sub>); <sup>13</sup>C NMR (150 MHz, DMSO-d<sub>6</sub>) δ 173.35, 170.60, 137.10, 136.09, 88.80, 81.52, 50.66, 48.03, 44.93, 42.07, 29.00, 27.07, 26.36; Anal calc for C<sub>26</sub>H<sub>32</sub>N<sub>2</sub>O<sub>8</sub> (500.55): C 62.39, H 6.44, N 5.60. Found: C 62.46, H 6.50, N 5.67.

*7-Carboxy-1-oxo-1,6,7,7a-tetrahydro-3a,6-epoxyisoindol-2(3H)-yl)dodecyl)-1-oxo-1,2,3,6,7,7a-hexahydro-3a,6-epoxyisoindole-7-carboxylic acid (2p)*

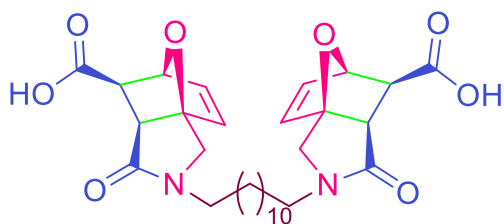

Beige solid, mp 94–95 °C;  $^1\text{H}$  NMR (600 MHz,  $\text{CDCl}_3$ )  $\delta$  6.49 (*d*,  $J = 5.7$  Hz, 2H,  $\text{H}_g$ ), 6.45 (*d*,  $J = 5.7$  Hz, 2H,  $\text{H}_f$ ), 5.24 (*d*,  $J = 2$  Hz, 2H,  $\text{H}_c$ ), 3.98 (*m*, 2H,  $\text{H}_d$ ), 3.72 (*d*,  $J = 11.9$  Hz, 2H,  $\text{H}_e$ ), 3.41–3.32 (*m*, 2H,  $\text{H}_h$ ), 3.28–3.19 (*m*, 2H,  $\text{H}_i$ ), 2.89 (*d*,  $J = 9.1$  Hz, 2H,  $\text{H}_a$ ), 2.80–2.78 (*m*, 2H,  $\text{H}_b$ ), 1.51 (*quin*,  $J = 7.02$  Hz, 4H,  $2\text{CH}_2$ ), 1.26–1.22 (*m*, 16H,  $8\text{CH}_2$ );  $^{13}\text{C}$  NMR (150 MHz,  $\text{CDCl}_3$ )  $\delta$  173.46, 172.37, 137.17, 134.95, 88.91, 82.35, 50.76, 48.95, 45.85, 43.16, 29.31, 29.26, 29.05, 26.94, 26.48; Anal calc for  $\text{C}_{30}\text{H}_{40}\text{N}_2\text{O}_8$  (556.66): C 64.73, H 7.24, N 5.03. Found: C 64.68, H 7.18, N 5.10.

<sup>1</sup>H NMR spectrum of compound **2a**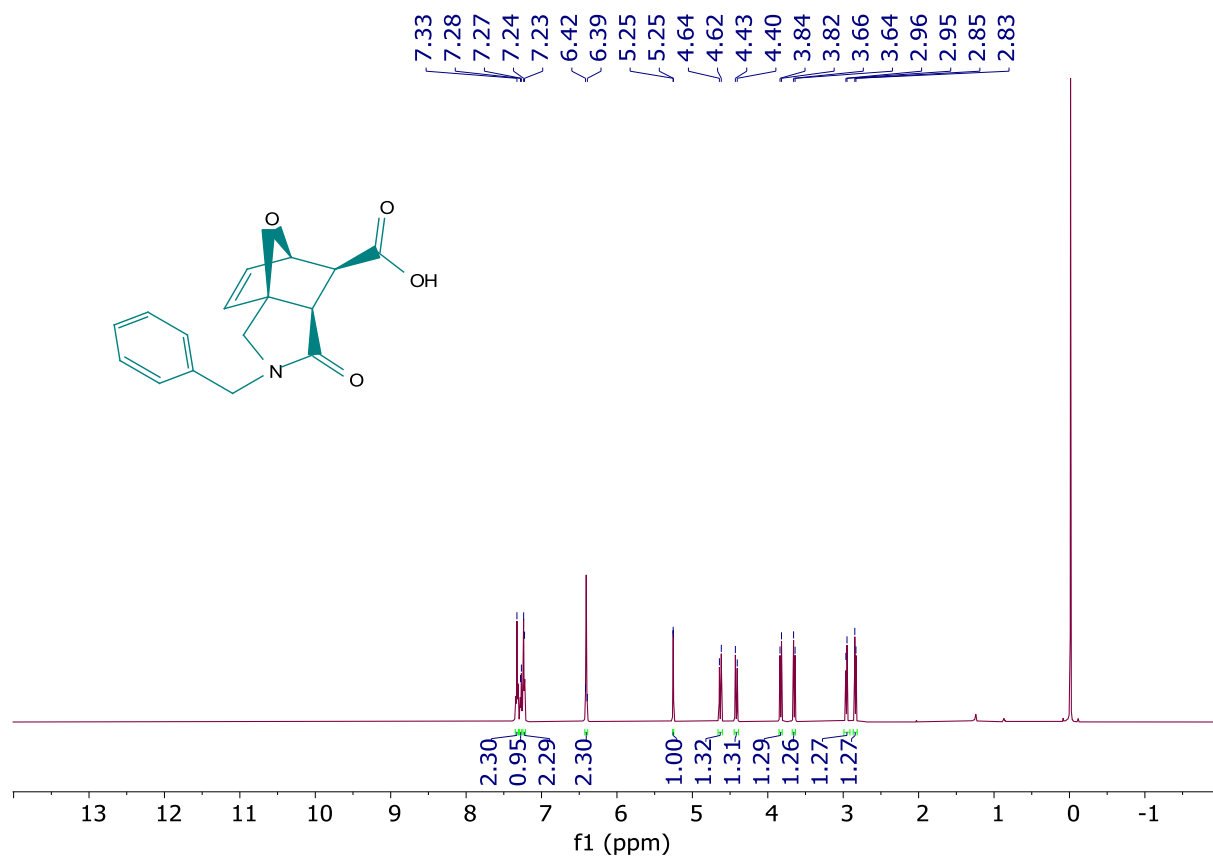

<sup>1</sup>H NMR spectrum of compound **2b**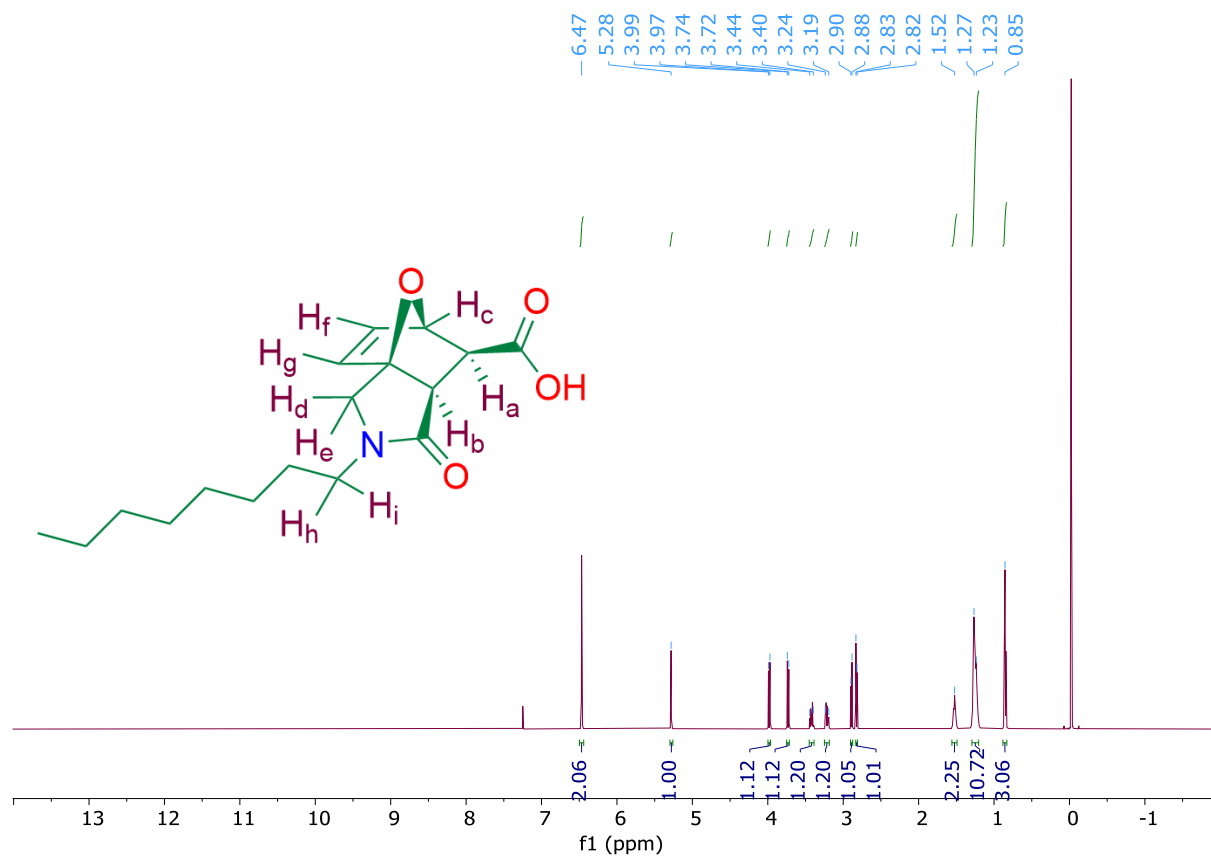

<sup>1</sup>H NMR spectrum of compound **2c**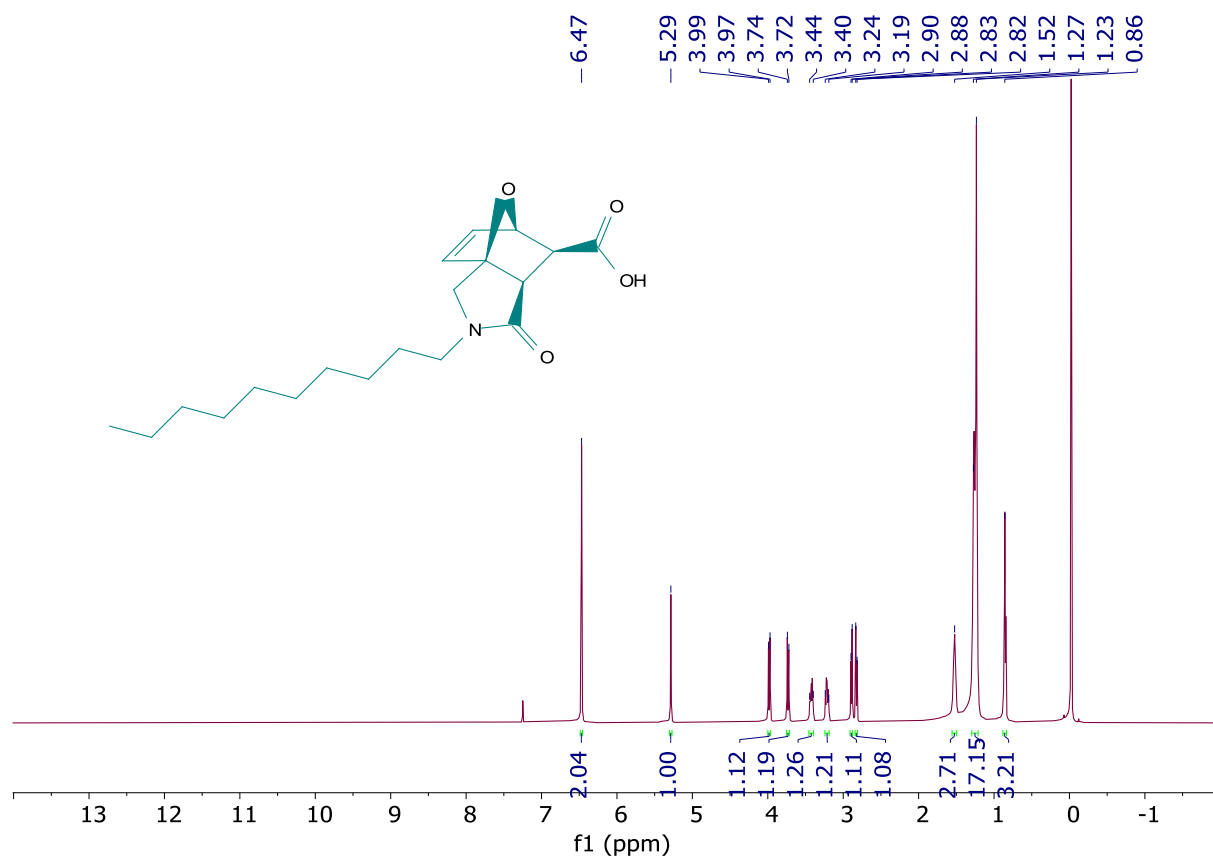

$^1\text{H}$  NMR spectrum of compound **2d**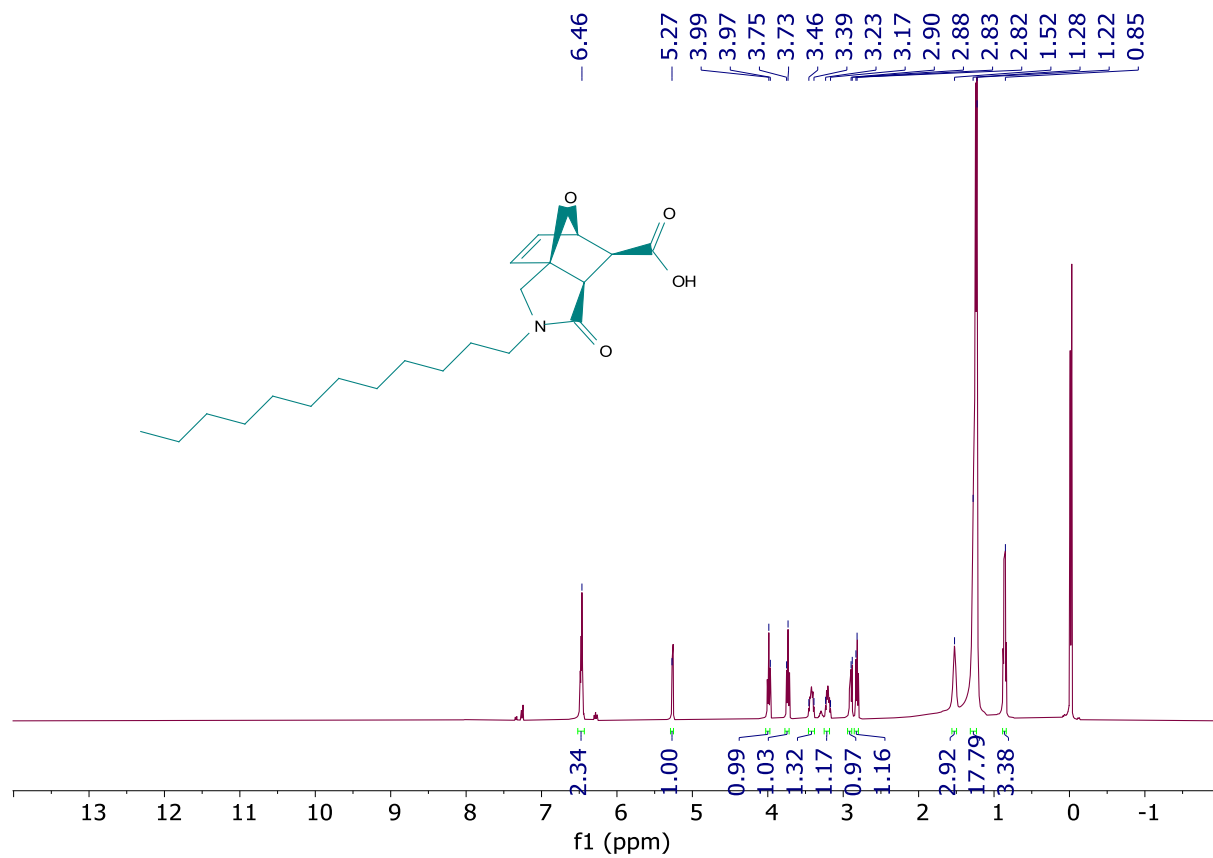



<sup>1</sup>H NMR spectrum of compound **2e**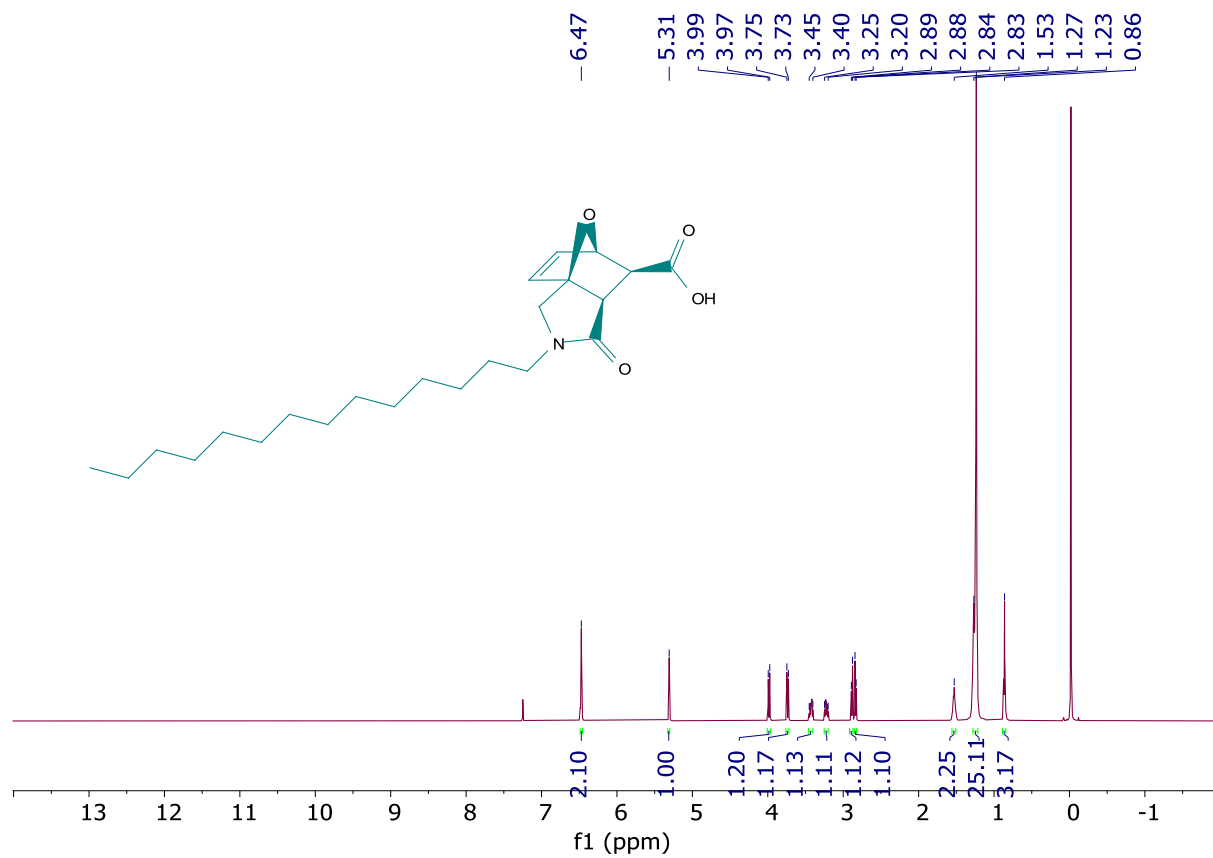

<sup>1</sup>H NMR spectrum of compound **2f**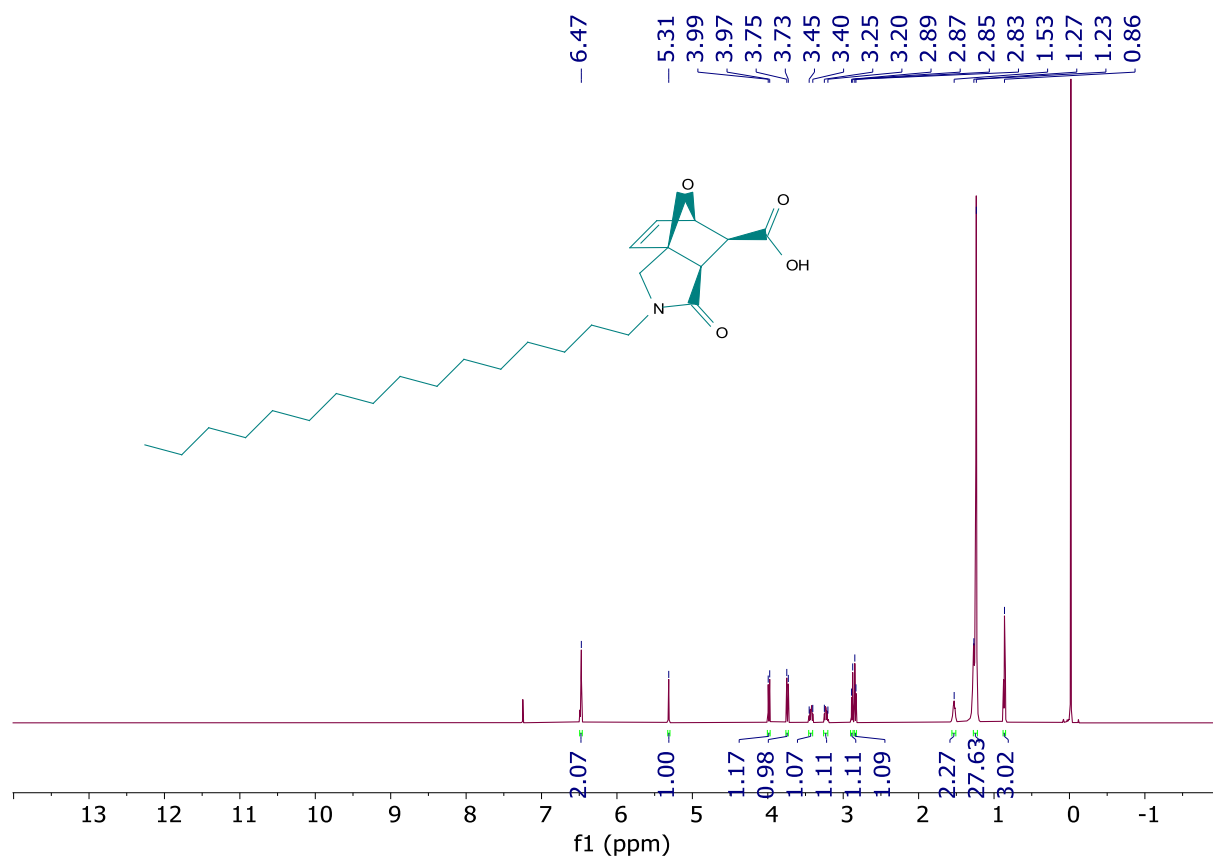

<sup>1</sup>H NMR spectrum of compound **2g**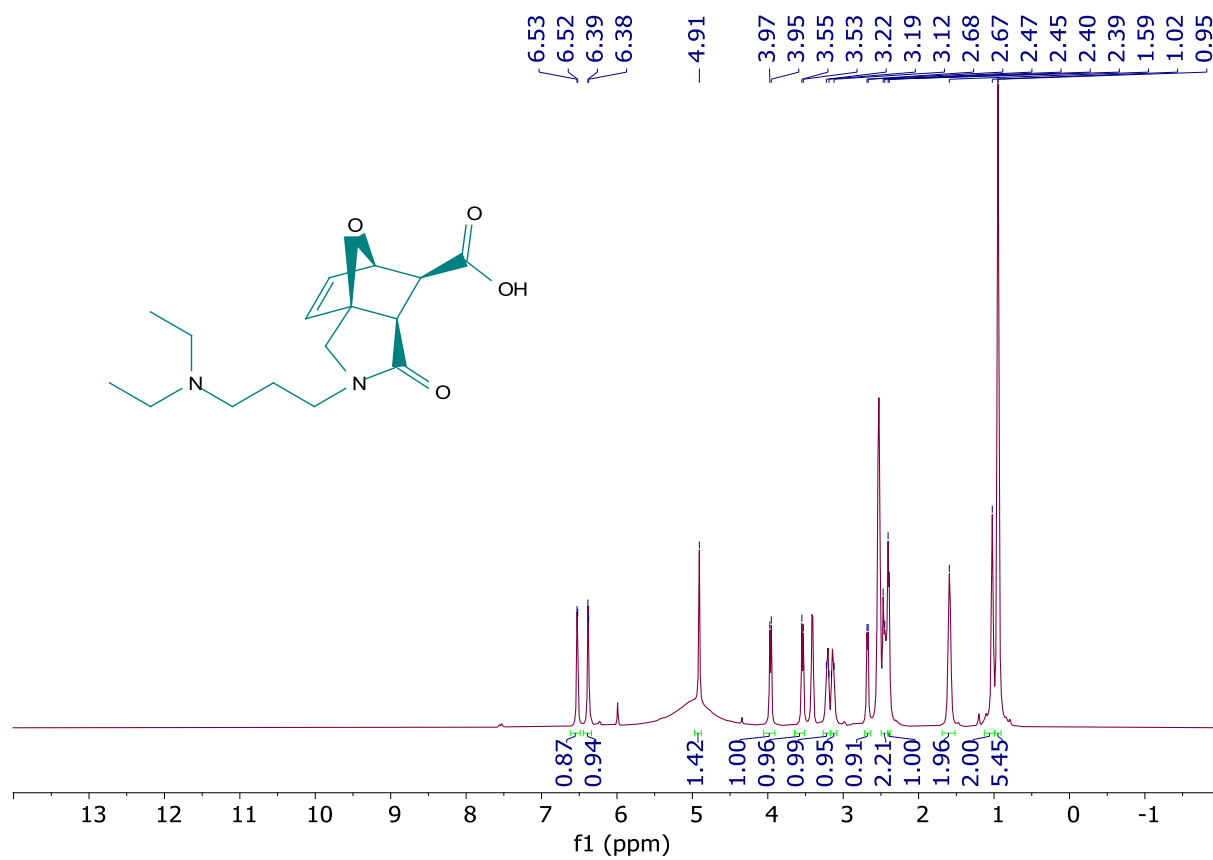

<sup>1</sup>H NMR spectrum of compound **2h**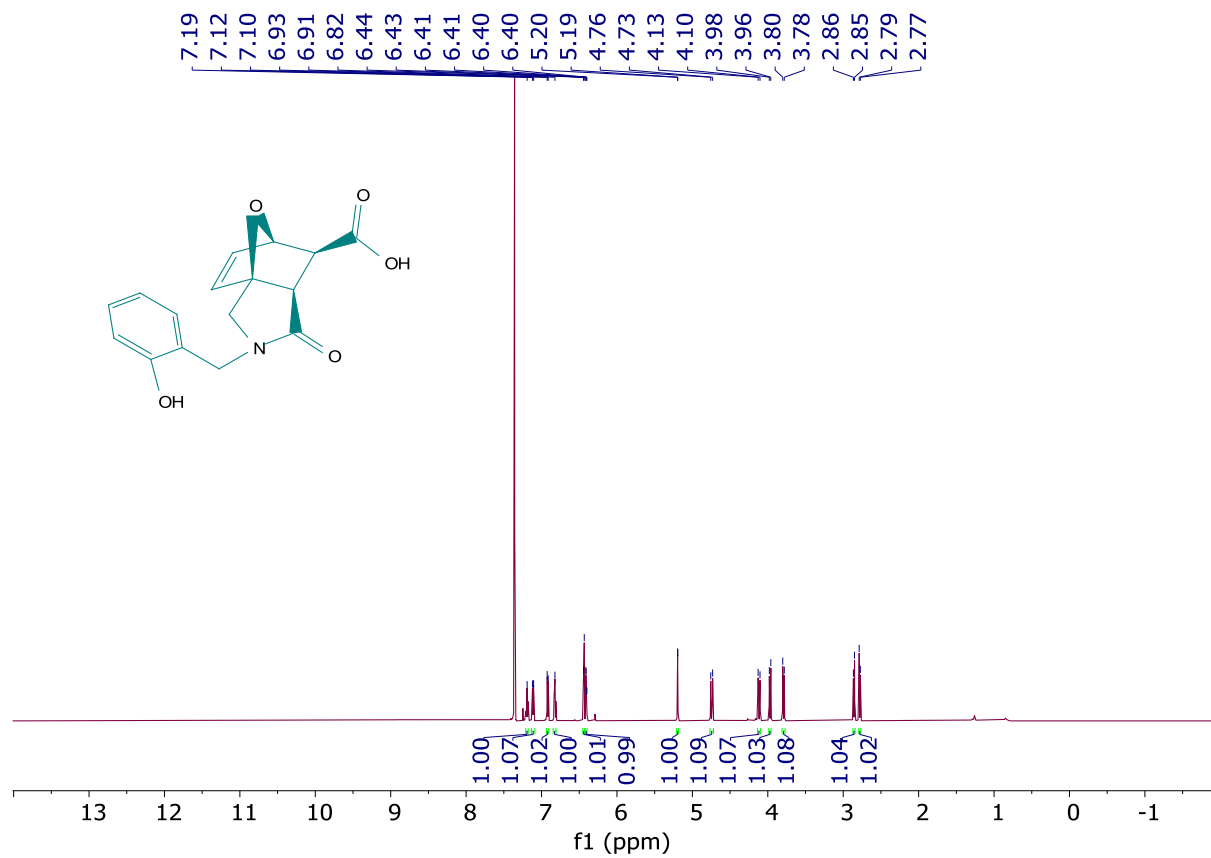

<sup>1</sup>H NMR spectrum of compound **2i**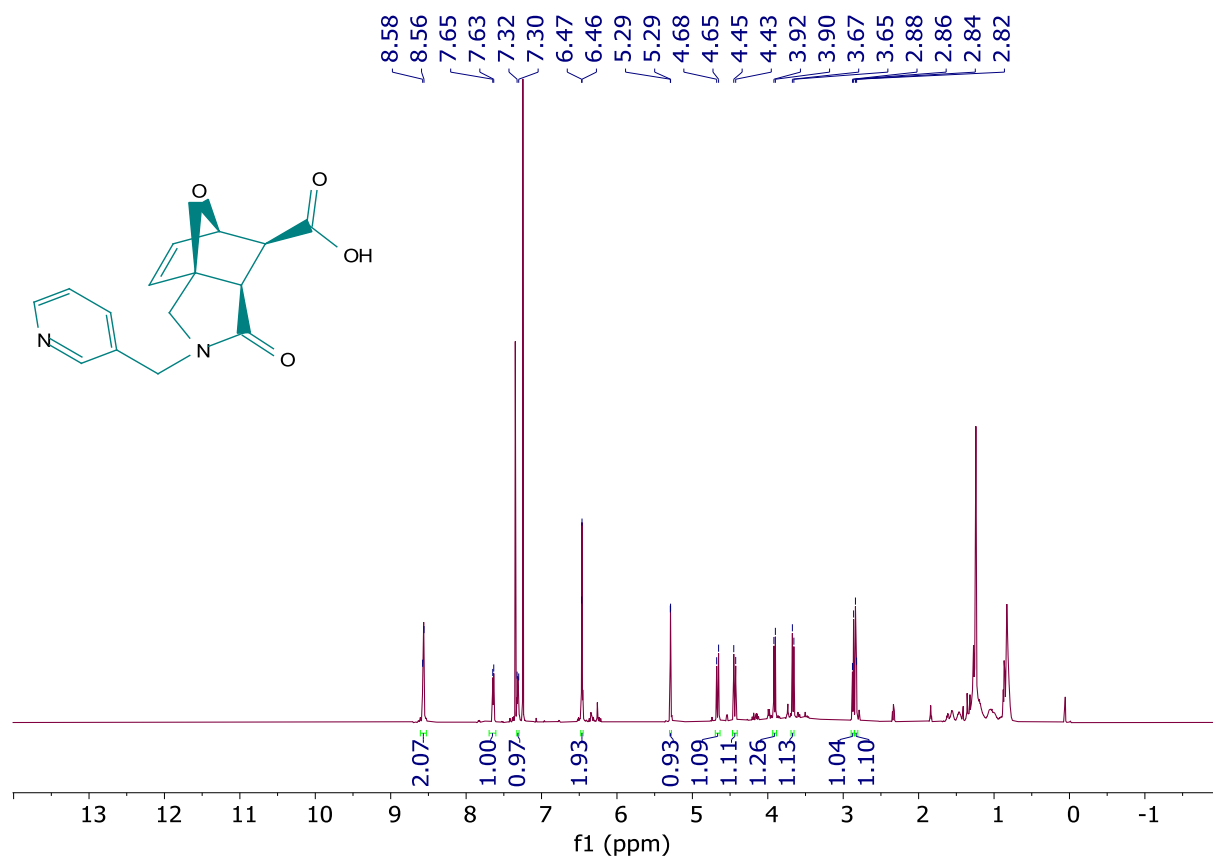

<sup>1</sup>H NMR spectrum of compound **2j**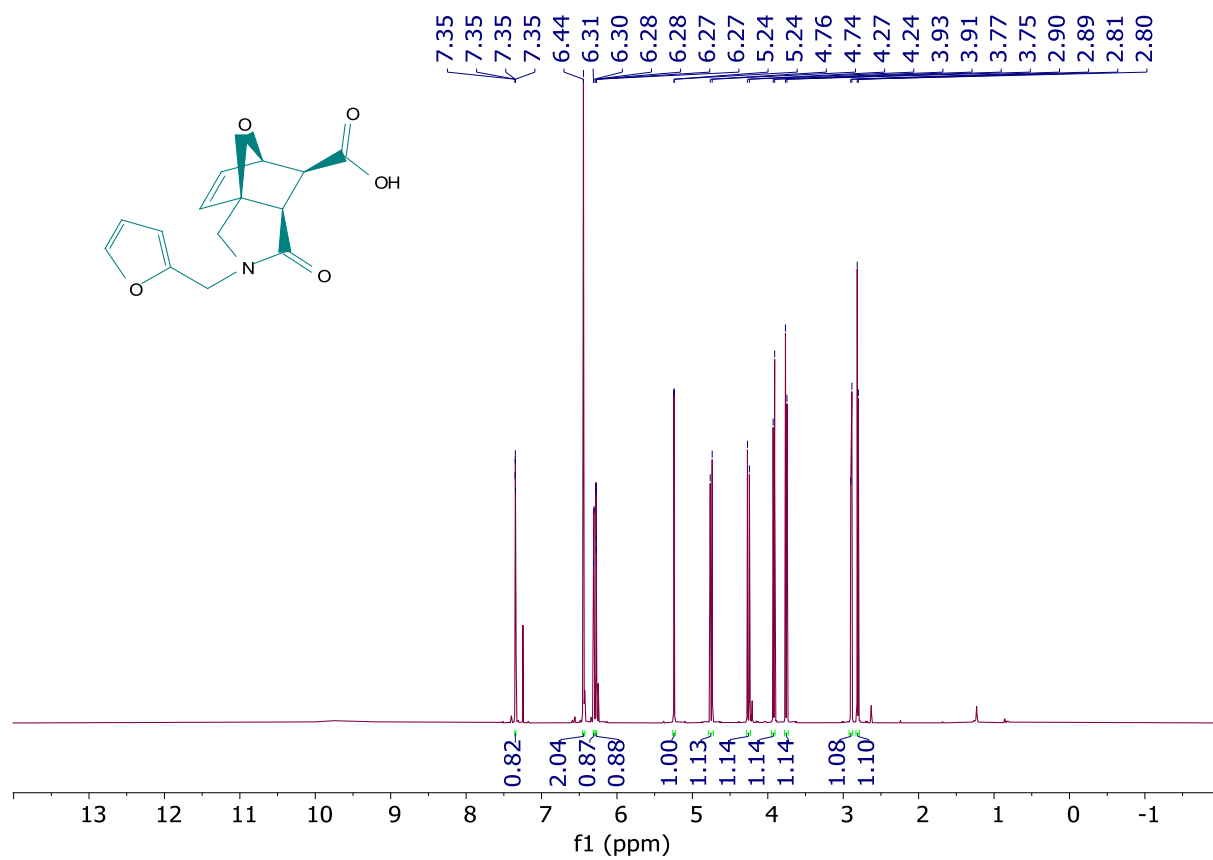

<sup>1</sup>H NMR spectrum of compound **2k**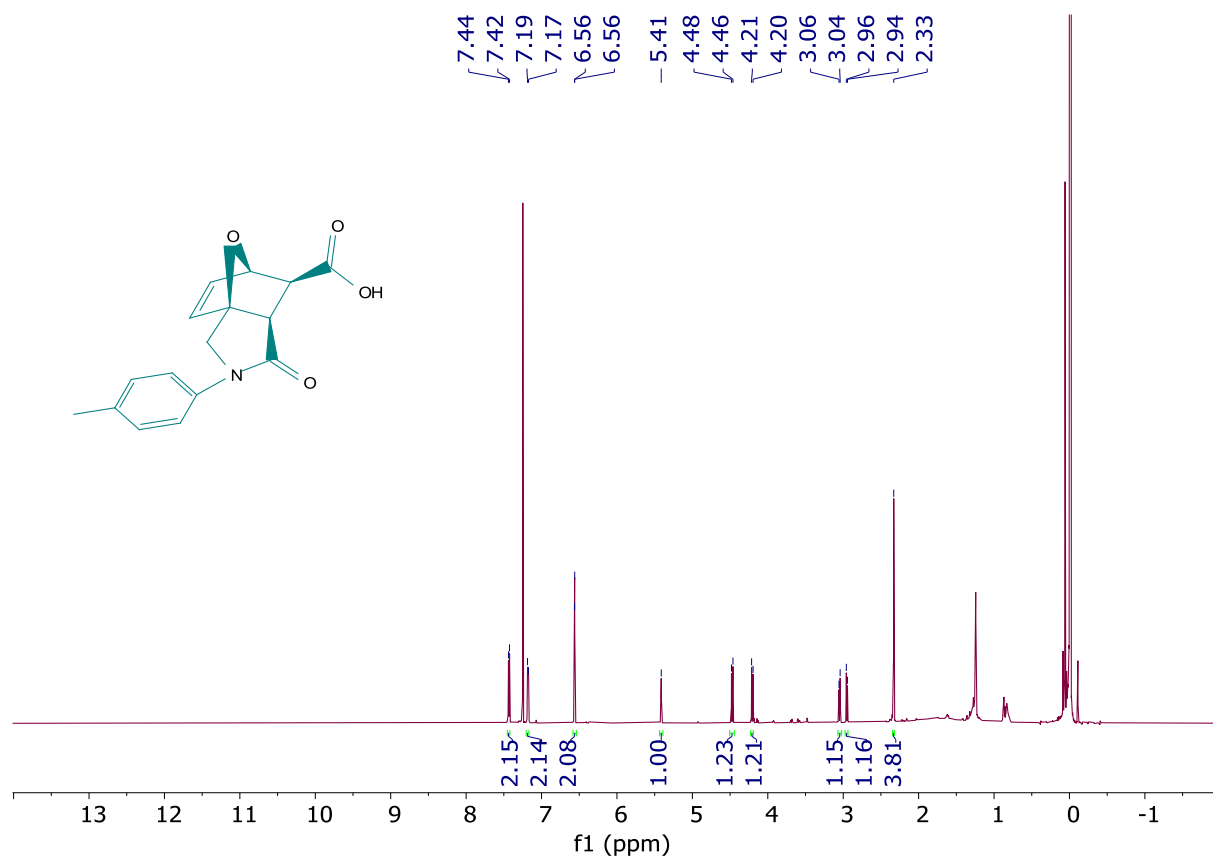

<sup>1</sup>H NMR spectrum of compound **21**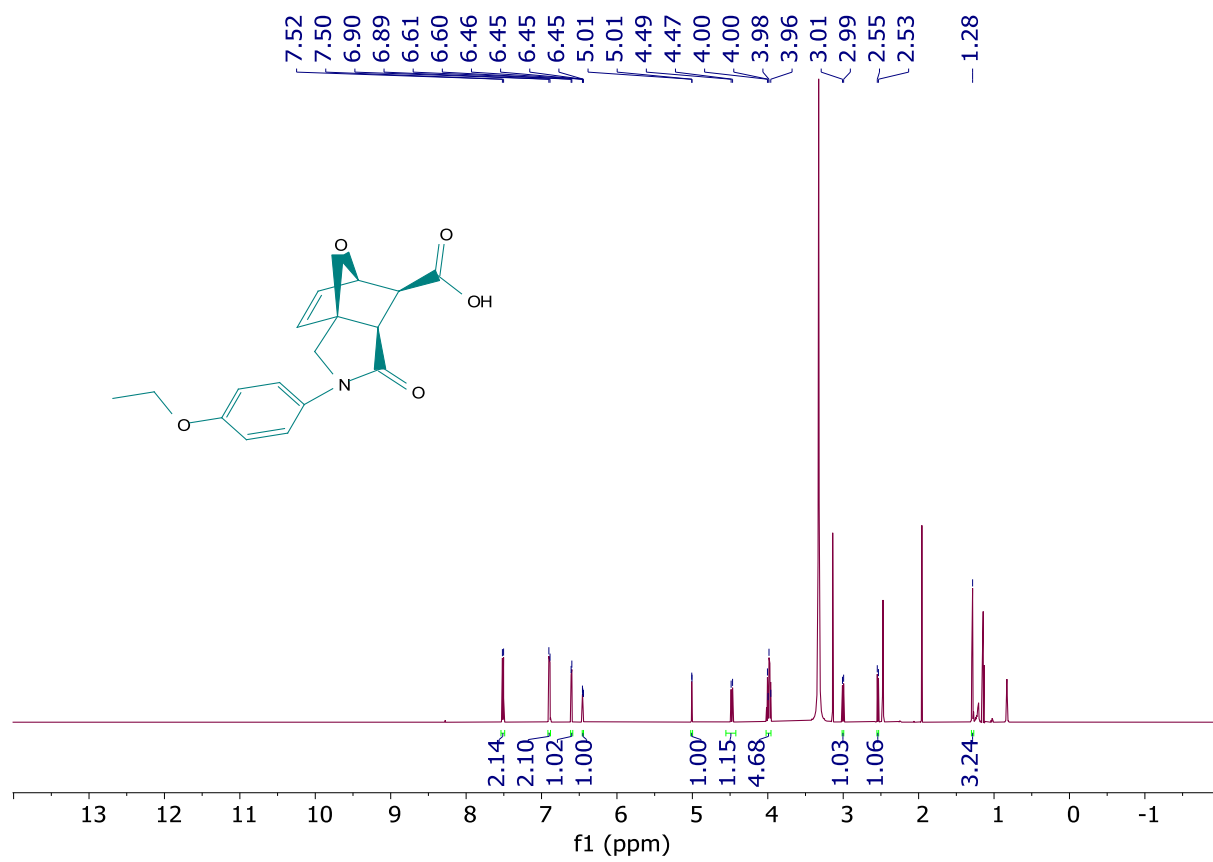



<sup>1</sup>H NMR spectrum of compound **2m**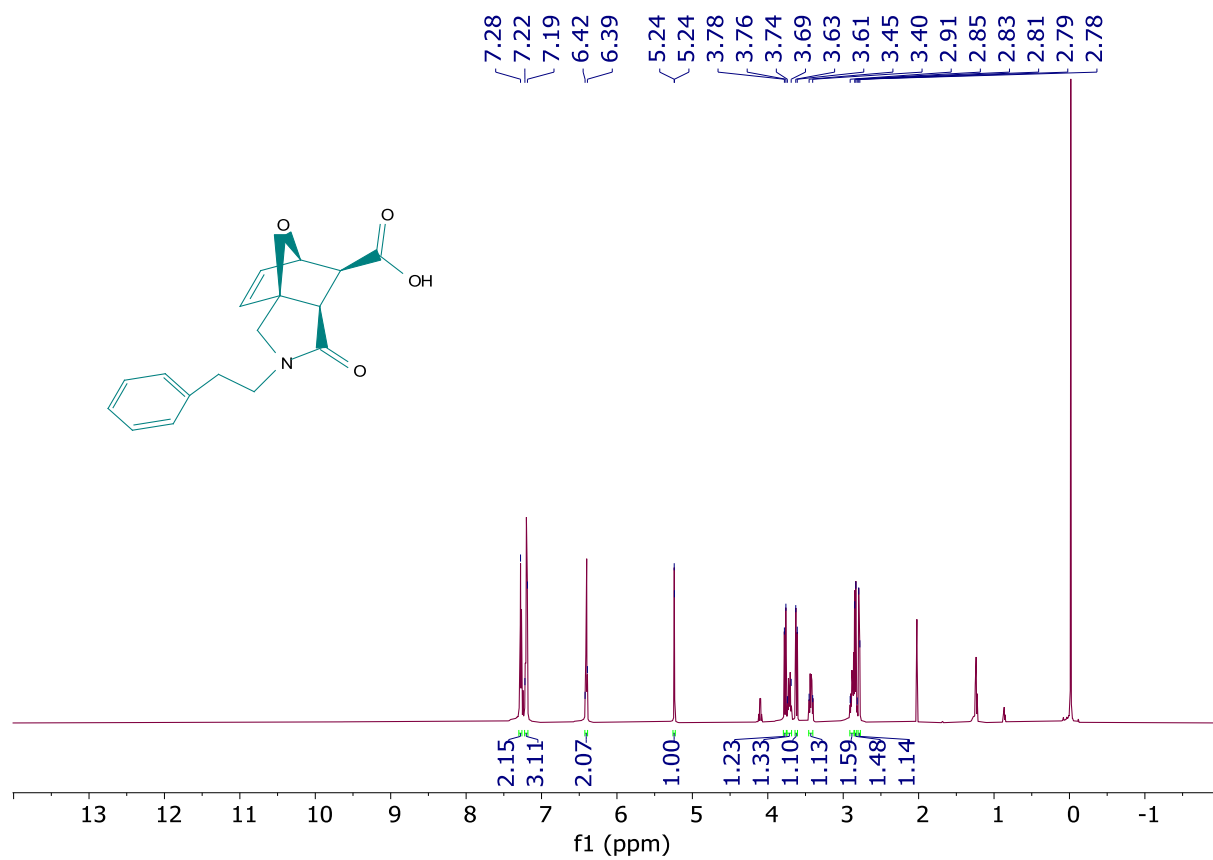

<sup>1</sup>H NMR spectrum of compound **2n**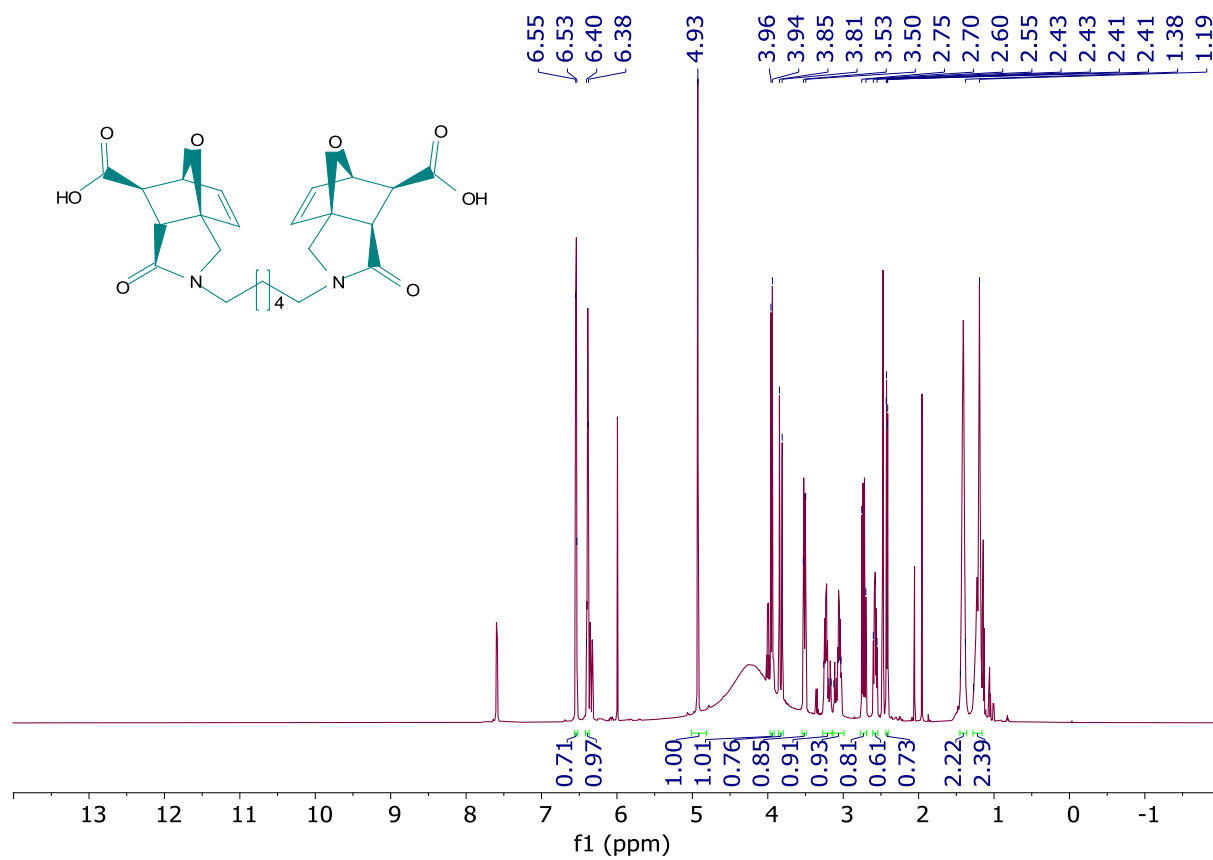

<sup>1</sup>H NMR spectrum of compound **2o**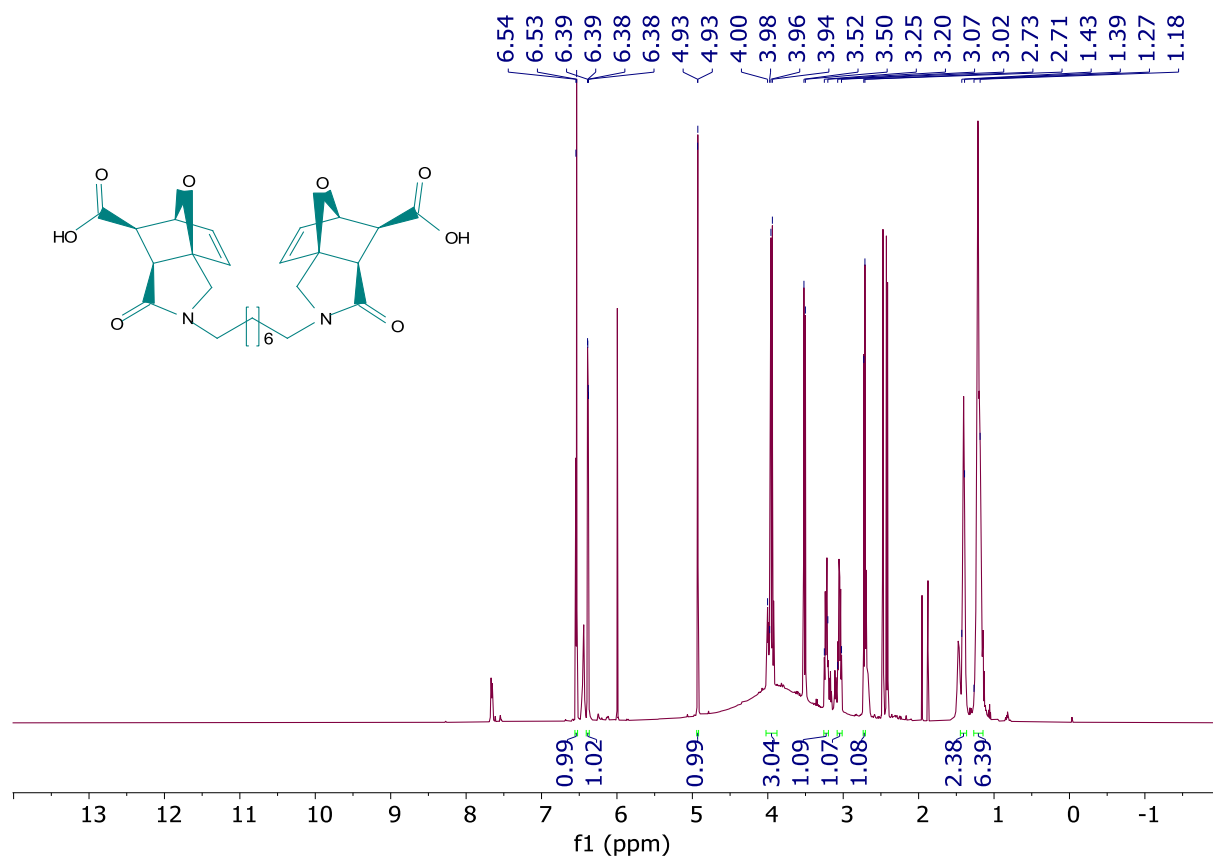

<sup>1</sup>H NMR spectrum of compound **2p**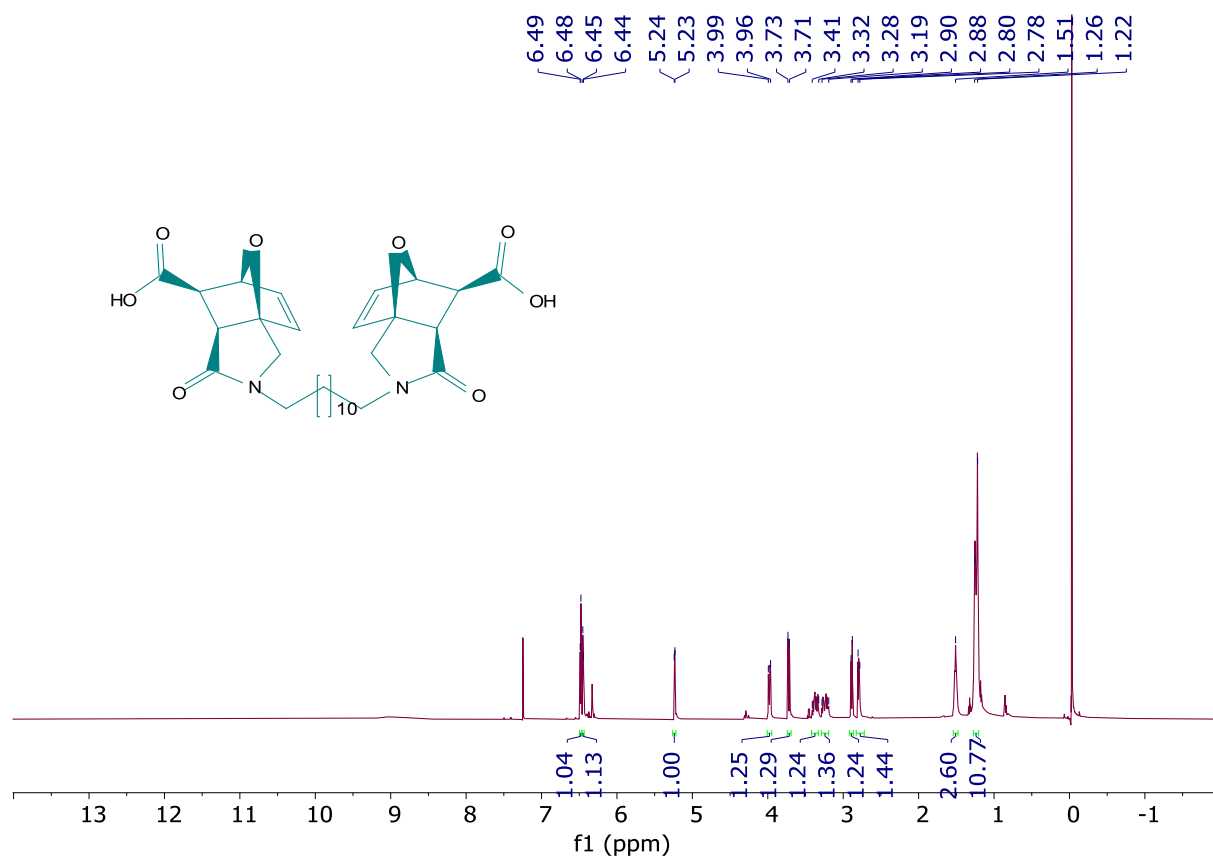

<sup>13</sup>C NMR spectrum of compound **2a**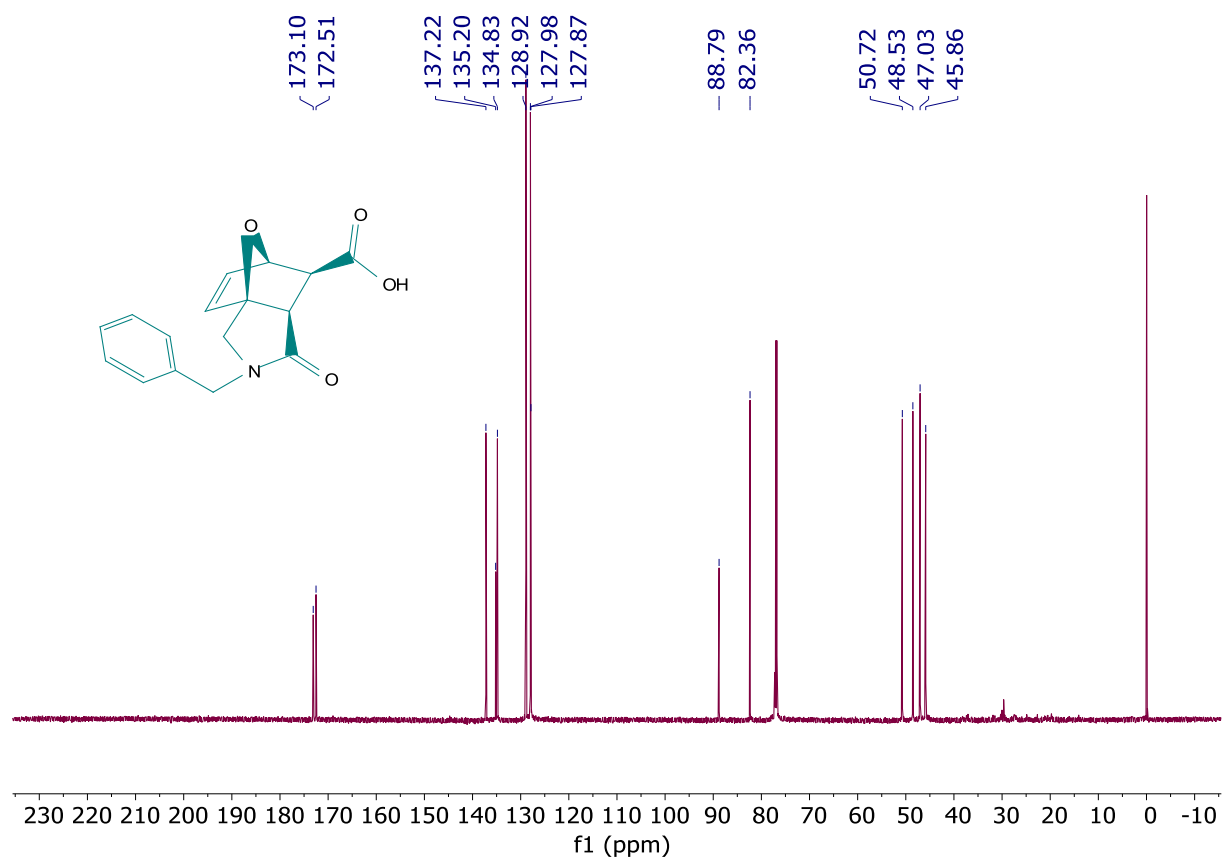

$^{13}\text{C}$  NMR spectrum of compound **2b**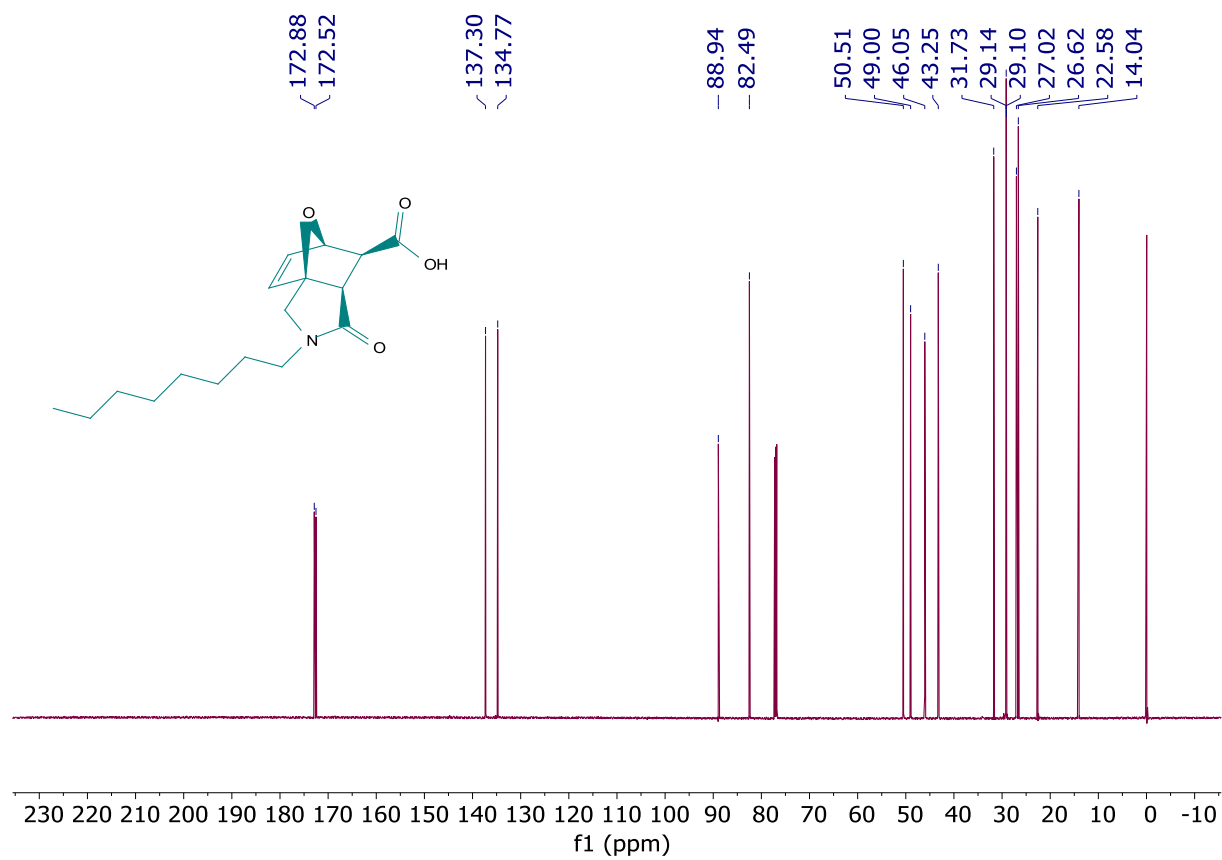

$^{13}\text{C}$  NMR spectrum of compound **2c**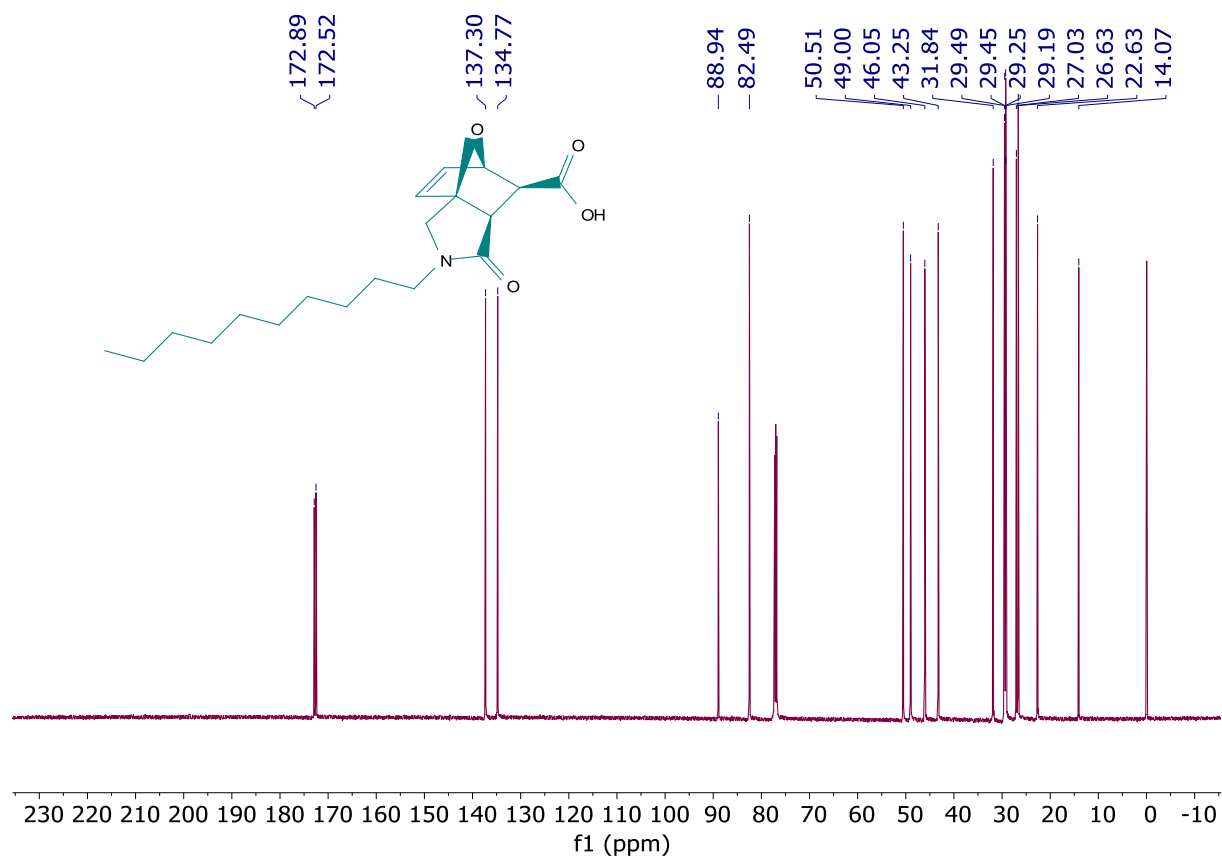

$^{13}\text{C}$  NMR spectrum of compound **2d**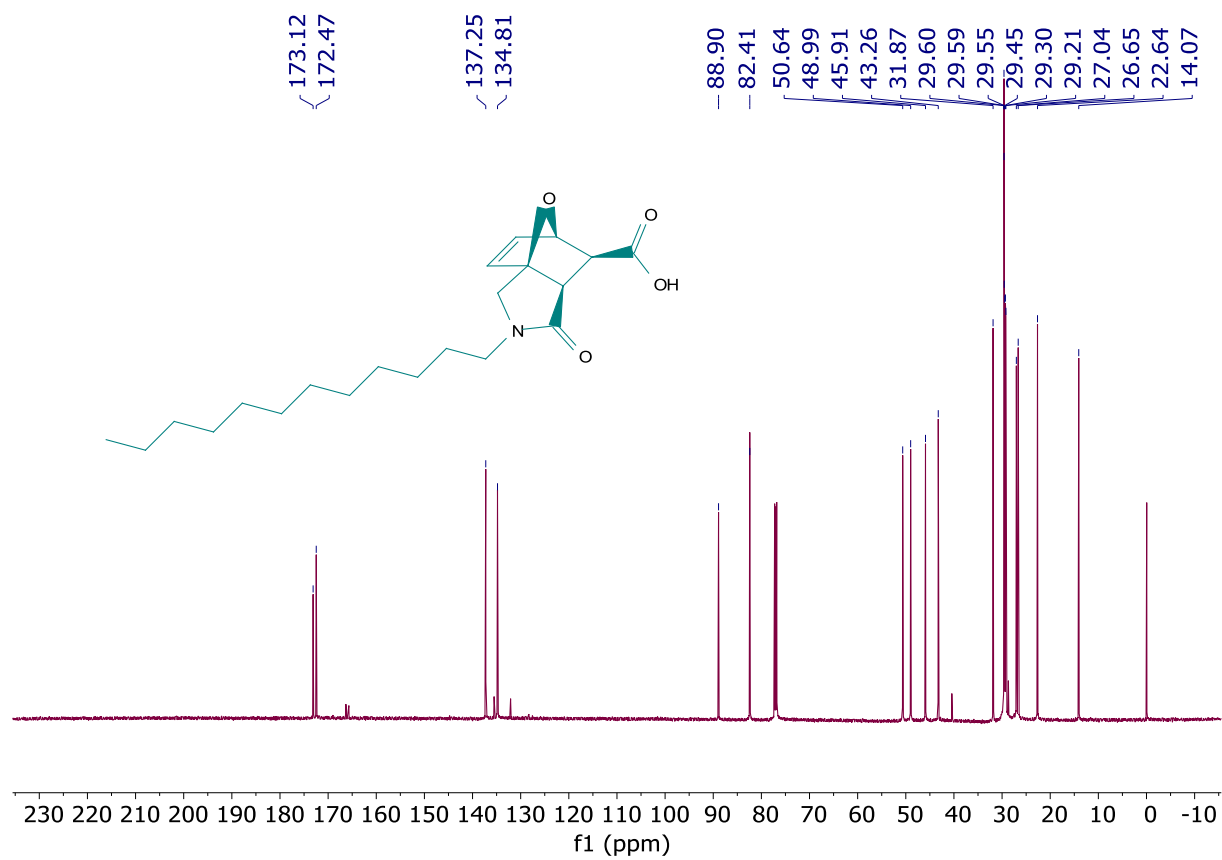



$^{13}\text{C}$  NMR spectrum of compound **2e**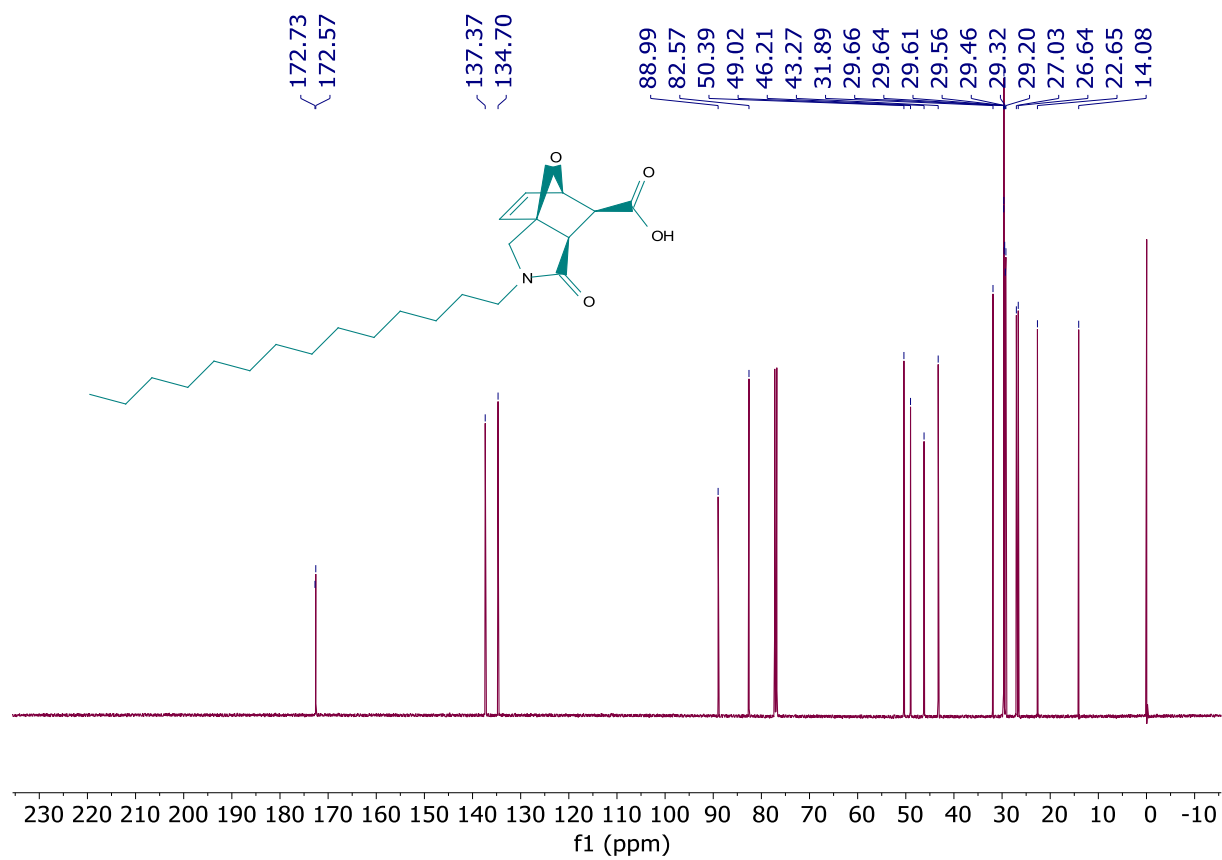

$^{13}\text{C}$  NMR spectrum of compound **2f**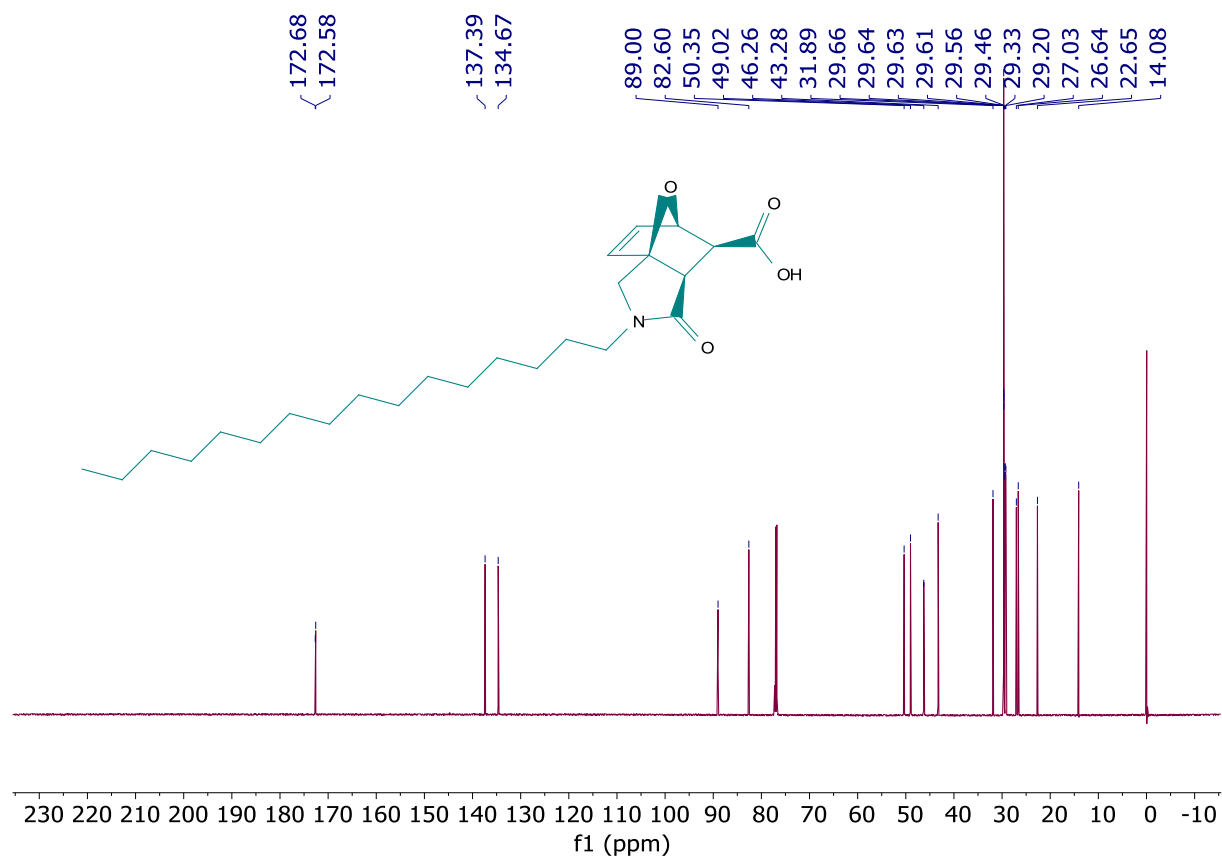

$^{13}\text{C}$  NMR spectrum of compound **2g**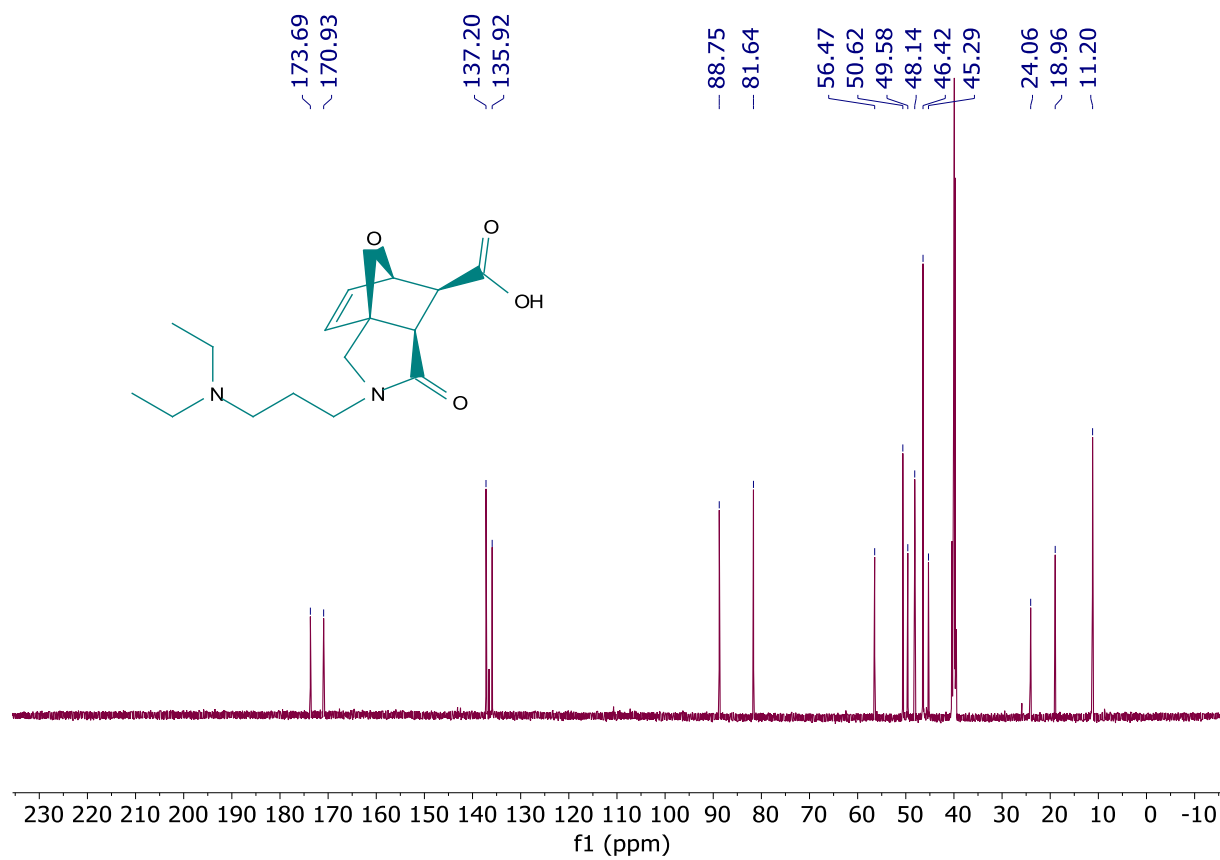

$^{13}\text{C}$  NMR spectrum of compound **2h**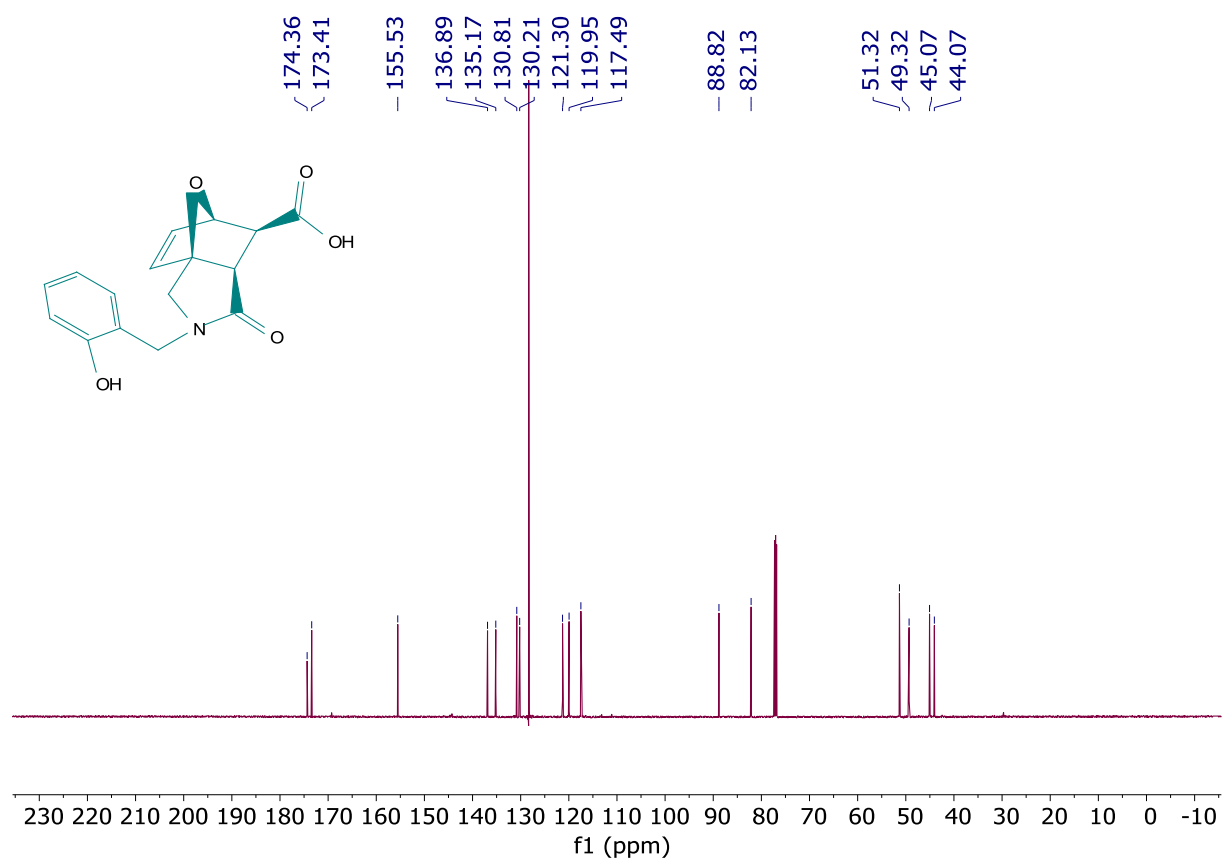

$^{13}\text{C}$  NMR spectrum of compound **2i**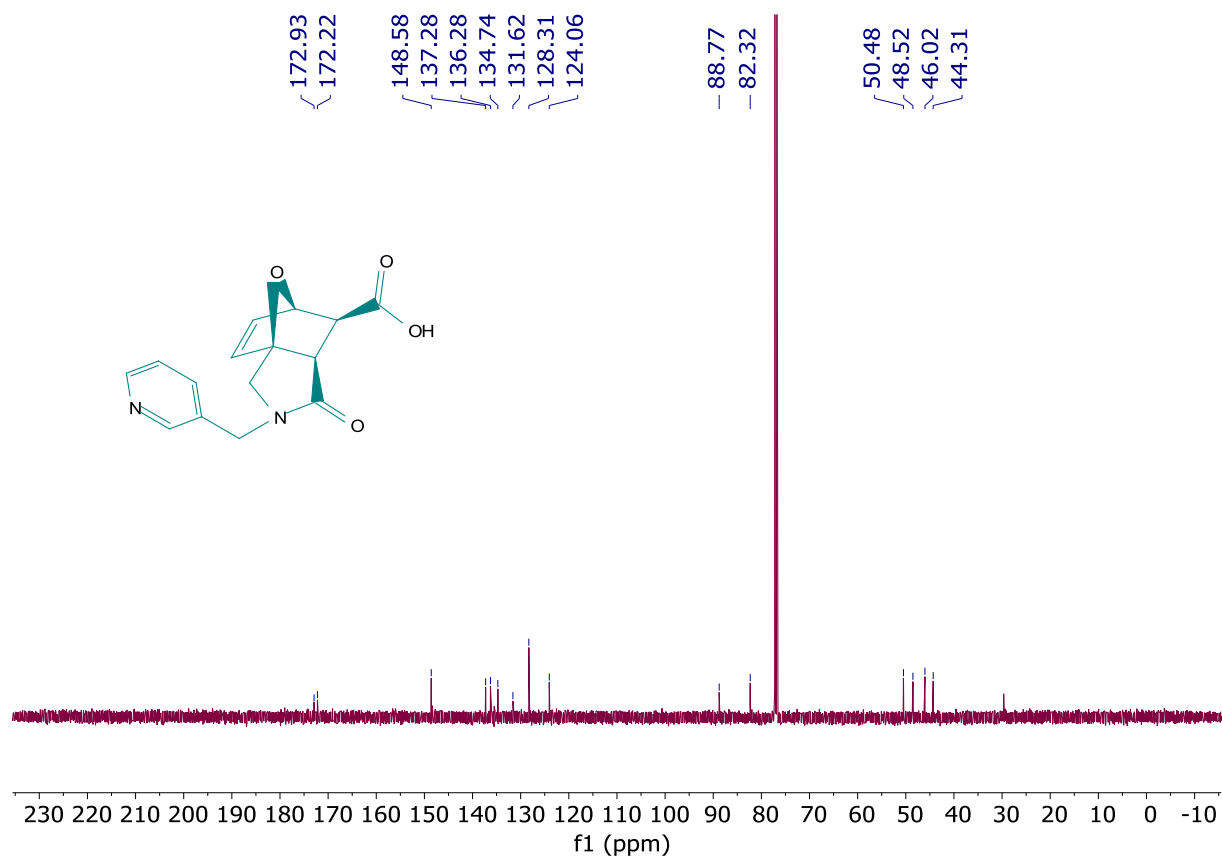

<sup>13</sup>C NMR spectrum of compound **2j**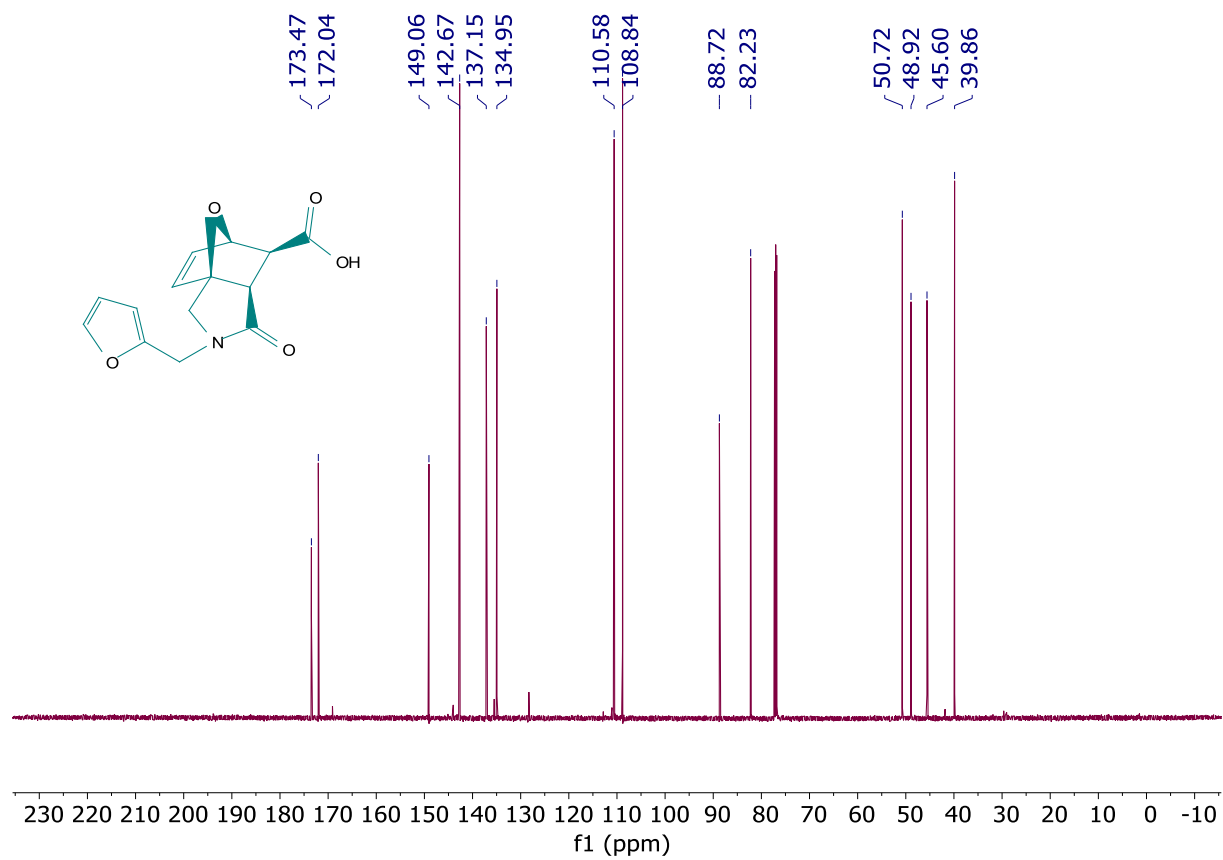

<sup>13</sup>C NMR spectrum of compound **2k**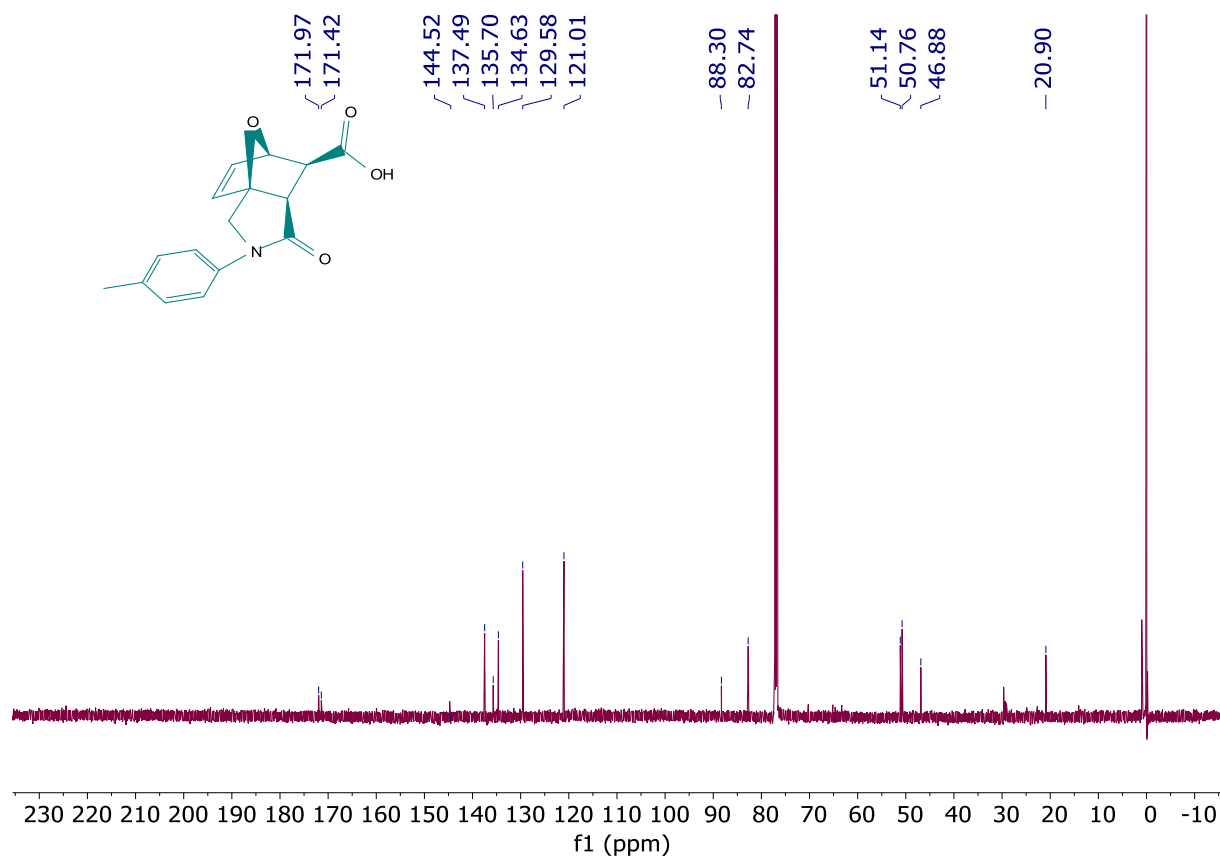

$^{13}\text{C}$  NMR spectrum of compound **21**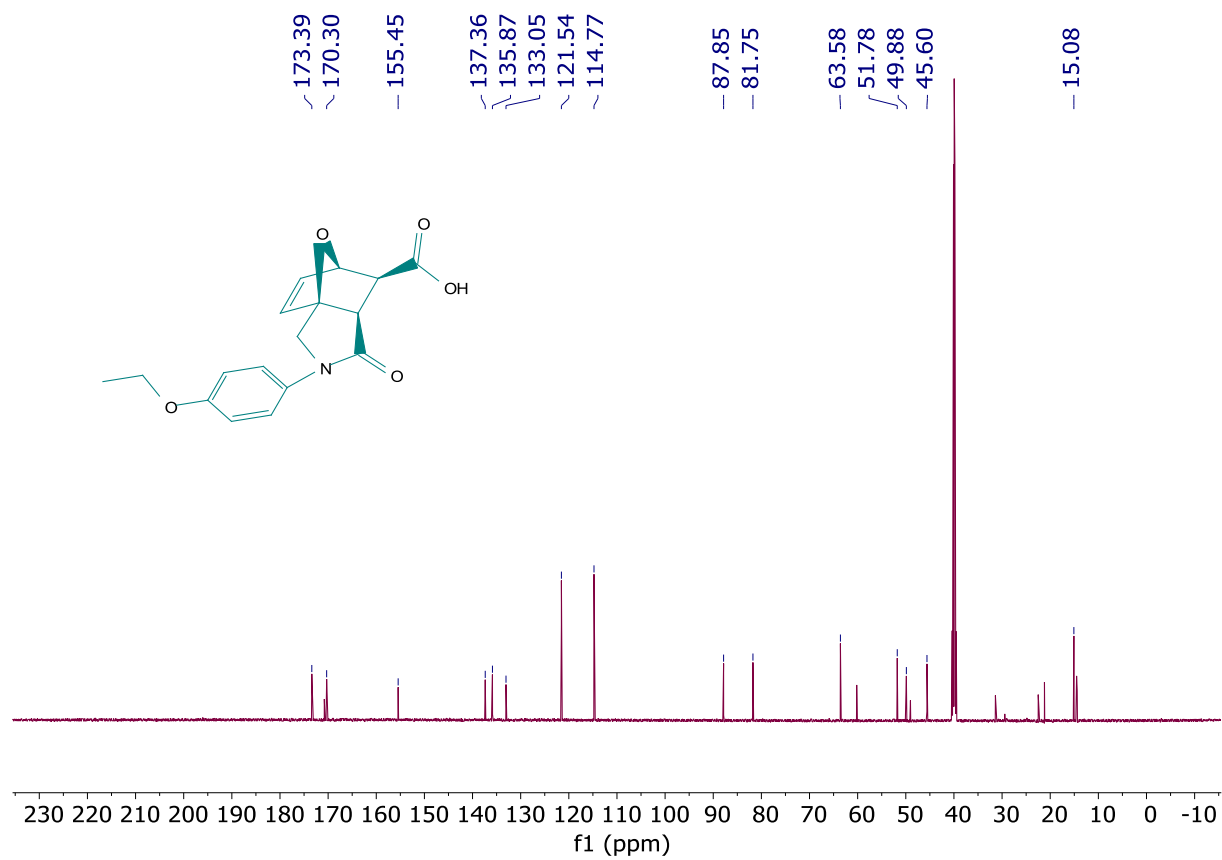



$^{13}\text{C}$  NMR spectrum of compound **2m**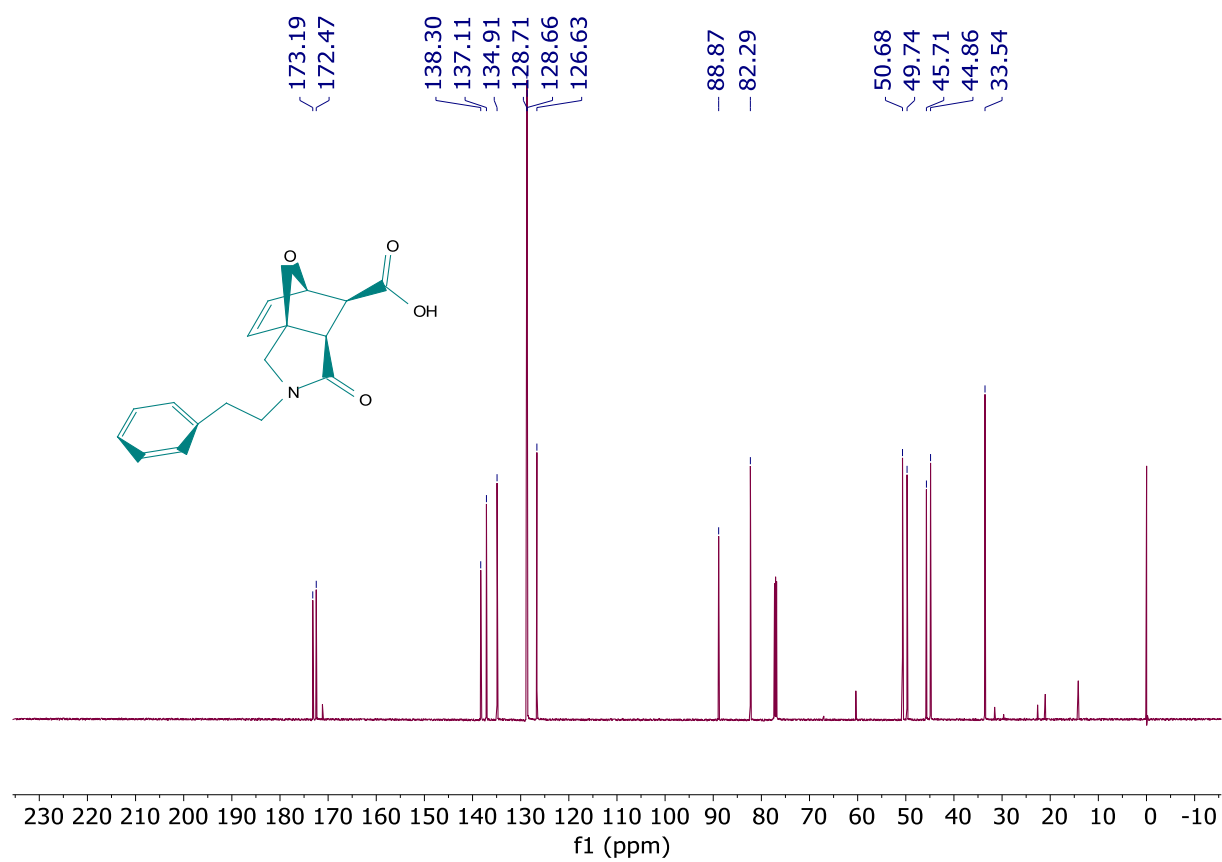

$^{13}\text{C}$  NMR spectrum of compound **2n**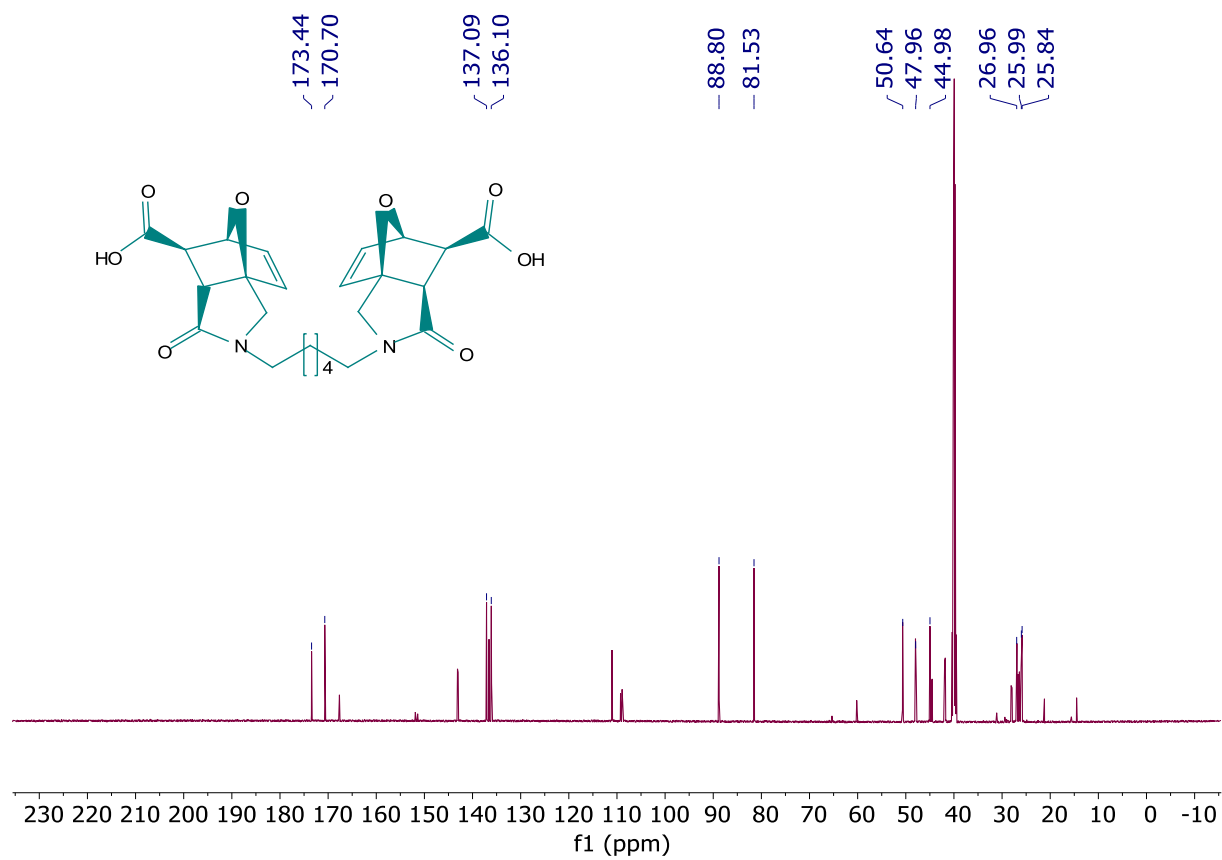

$^{13}\text{C}$  NMR spectrum of compound **2o**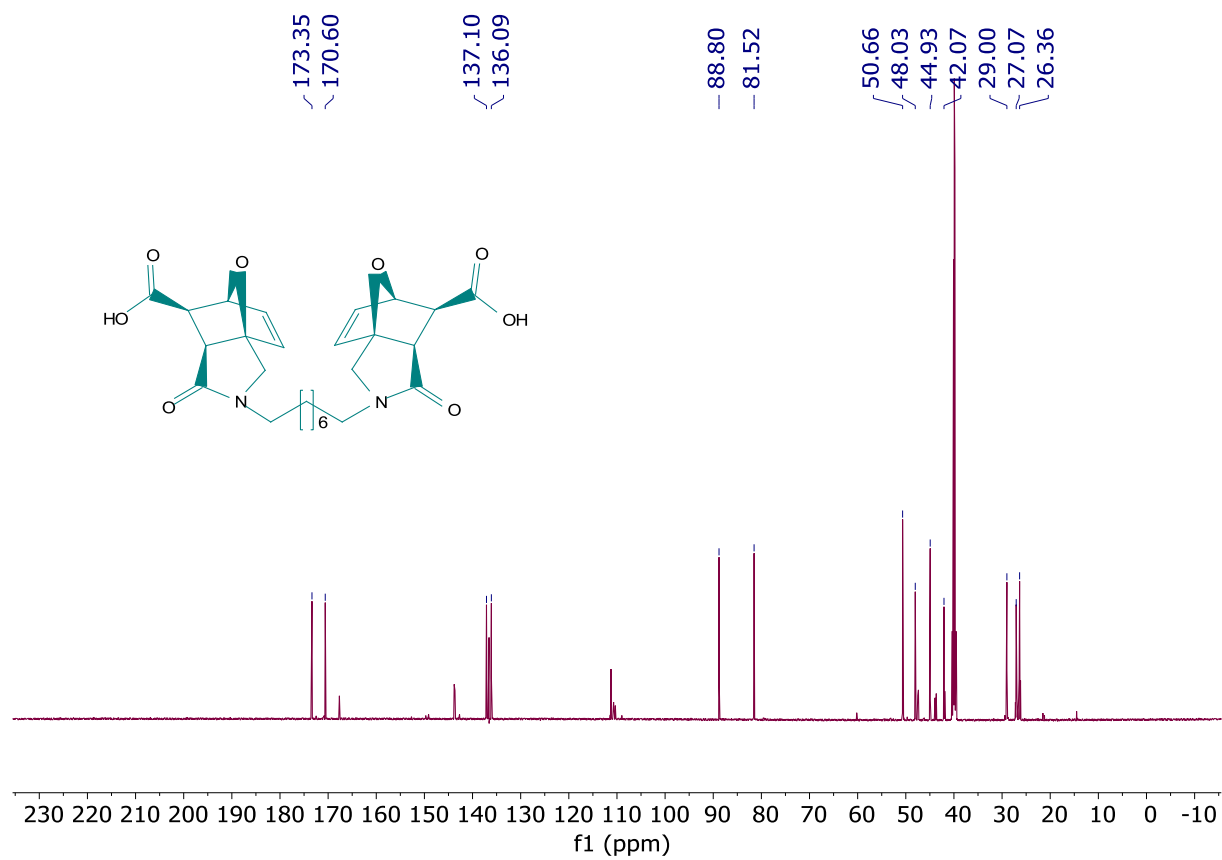

$^{13}\text{C}$  NMR spectrum of compound **2p**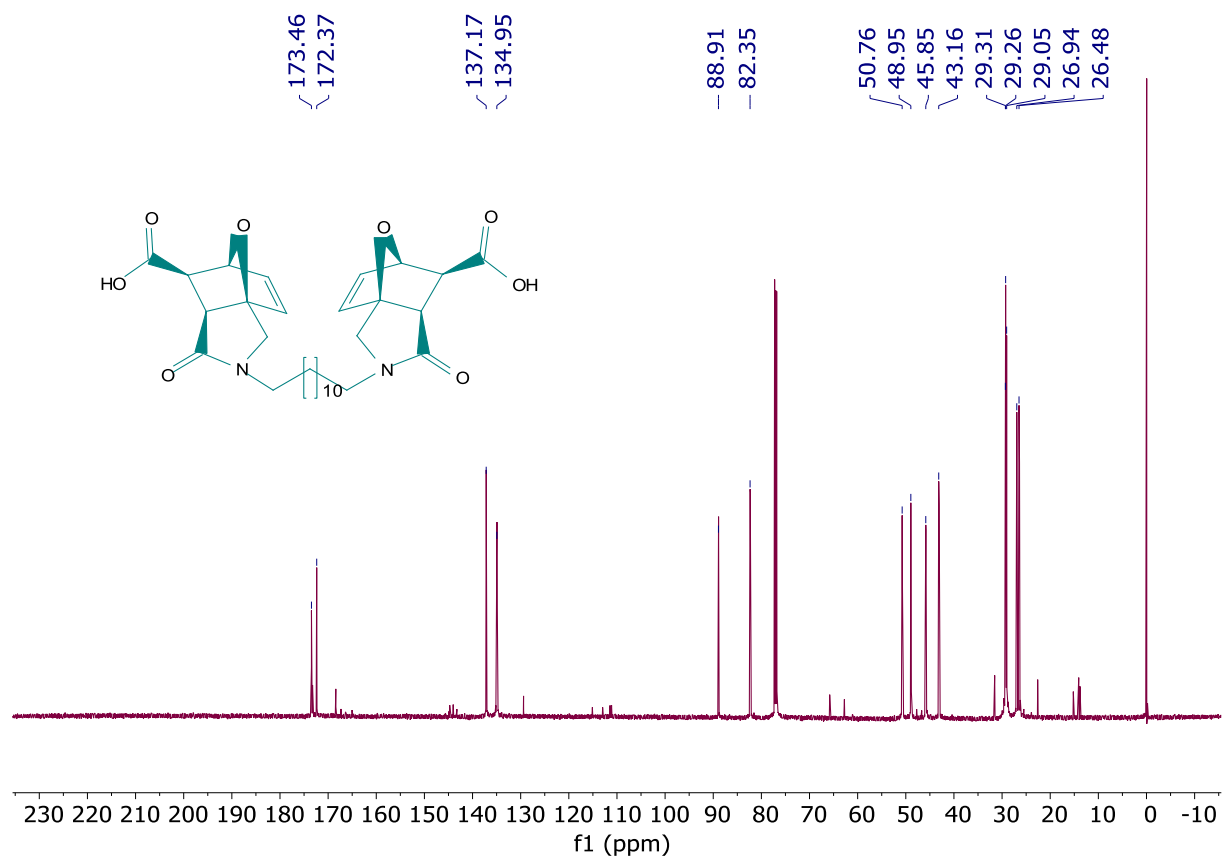

**Endo reactant**

0 1

|   |             |             |             |
|---|-------------|-------------|-------------|
| C | -0.68105319 | -0.42057247 | -4.11655978 |
| C | 0.67717376  | -0.61758367 | -3.41798477 |
| C | 2.20217097  | -0.68078790 | -0.38879074 |
| C | 1.03385670  | 1.28062232  | -0.51828232 |
| C | 1.15126655  | 0.25597251  | 0.26261424  |
| C | 2.00261092  | 0.95440145  | -1.61502520 |
| C | 0.72519654  | -1.78751769 | -2.40935384 |
| O | 3.15491965  | 0.23470299  | -0.94739991 |
| O | -1.05028924 | 0.73221371  | -4.46057830 |
| O | -1.52266159 | -1.54759791 | -4.37436038 |
| C | 2.23788731  | -1.94945660 | 0.28603198  |
| C | -0.14091623 | -2.09482392 | -1.11056701 |
| N | 0.80701641  | -2.90980363 | 0.11435415  |
| O | -1.39120403 | -2.01085108 | -1.22567187 |
| C | -0.18900290 | -2.77756389 | 1.70676446  |
| C | -0.16008257 | -3.91513651 | 2.74441710  |
| C | -0.10595988 | -6.05373890 | 4.69522228  |
| C | 0.94594425  | -3.95267374 | 3.81538034  |
| C | -1.10798220 | -4.88319819 | 2.71510692  |
| C | -1.07921688 | -6.02073575 | 3.75275397  |
| C | 0.97125142  | -4.95369454 | 4.72854950  |
| H | 1.41933988  | -0.77081073 | -4.17337926 |
| H | 0.39064704  | 2.12997472  | -0.41948176 |
| H | 0.60640214  | 0.07592032  | 1.16572718  |
| H | 2.27442299  | 1.83710026  | -2.15529099 |
| H | 1.10095772  | -2.61627141 | -2.97226298 |
| H | -2.44177875 | -1.27081862 | -4.35853577 |

|   |             |             |            |
|---|-------------|-------------|------------|
| H | 2.31968236  | -1.42768837 | 1.21660884 |
| H | 3.10313300  | -2.56825575 | 0.17057691 |
| H | -1.20041544 | -2.58799675 | 1.41350027 |
| H | 0.22965087  | -1.89173360 | 2.13685694 |
| H | -0.08600498 | -6.84414607 | 5.41621417 |
| H | 1.69443971  | -3.18836860 | 3.83851036 |
| H | -1.87639970 | -4.85716564 | 1.97096744 |
| H | -1.82768047 | -6.78506326 | 3.72961340 |
| H | 1.73966316  | -4.97970448 | 5.47270480 |

**Endo TS**

0 1

|   |            |             |             |
|---|------------|-------------|-------------|
| C | 2.56949297 | -0.03606042 | 0.89292158  |
| C | 1.35625953 | 0.09799597  | 1.66514517  |
| C | 1.95536874 | 0.94378641  | 4.01274227  |
| C | 3.10498688 | -0.97728403 | 3.55171276  |
| C | 3.28364420 | 0.37019541  | 3.79190636  |
| C | 1.71067887 | -1.23145297 | 3.69421548  |
| C | 1.11973698 | 1.22946305  | 2.48168094  |
| O | 1.09494876 | -0.19205110 | 4.34592178  |
| O | 3.63339071 | 0.55447160  | 0.96286120  |
| O | 2.46222354 | -1.07275396 | -0.02478465 |
| C | 1.76002894 | 2.27773734  | 4.69238106  |
| C | 1.62892495 | 2.64682886  | 2.27555887  |
| N | 1.79862964 | 3.26242858  | 3.56219574  |
| O | 1.74617124 | 3.26272424  | 1.24570507  |
| C | 2.71984396 | 4.41766875  | 3.68779130  |
| C | 4.16814728 | 4.00964918  | 3.83127399  |
| C | 6.85320193 | 3.25532162  | 4.09453193  |
| C | 4.86938450 | 4.30687862  | 5.00761662  |
| C | 4.81512036 | 3.33458672  | 2.78510728  |
| C | 6.15309863 | 2.95749328  | 2.92013701  |
| C | 6.21048664 | 3.93145142  | 5.13569059  |
| H | 0.53789030 | -0.56938396 | 1.41223471  |
| H | 3.84736140 | -1.69915042 | 3.25260102  |
| H | 4.19355453 | 0.94887153  | 3.72065187  |
| H | 1.11298832 | -2.11471683 | 3.58174209  |
| H | 0.04796750 | 1.29225386  | 2.80299571  |
| H | 3.27919049 | -1.16253901 | -0.57814799 |

|   |            |            |            |
|---|------------|------------|------------|
| H | 2.54012312 | 2.48626701 | 5.45534980 |
| H | 0.77056544 | 2.34957724 | 5.19848292 |
| H | 2.37923655 | 5.03963539 | 4.54572322 |
| H | 2.59267521 | 5.05102584 | 2.77044431 |
| H | 7.89713445 | 2.96457035 | 4.19487782 |
| H | 4.37872286 | 4.83689506 | 5.82121173 |
| H | 4.27571472 | 3.09713283 | 1.86110073 |
| H | 6.64941974 | 2.43187549 | 2.10395399 |
| H | 6.75468215 | 4.16886387 | 6.04812797 |



**Endo product**

0 1

|   |             |             |             |
|---|-------------|-------------|-------------|
| C | -0.02653584 | 0.15567848  | -3.26308240 |
| C | 1.18873004  | -0.42703240 | -2.51798048 |
| C | 1.58884181  | -1.59877832 | -0.56364500 |
| C | 0.72178144  | 0.47077928  | -0.19907896 |
| C | 0.62582889  | -0.73219852 | 0.28058230  |
| C | 1.75978767  | 0.30967281  | -1.27701791 |
| C | 0.96282978  | -1.82182629 | -1.89921826 |
| O | 2.71558141  | -0.73057451 | -0.74925765 |
| O | -0.21130984 | 1.40017132  | -3.28890296 |
| O | -0.94502655 | -0.71742925 | -3.92562122 |
| C | 1.59102231  | -2.96353643 | 0.00459331  |
| C | -0.31471734 | -2.40743388 | -1.34966937 |
| N | 0.09959290  | -3.25401072 | -0.14356407 |
| O | -1.48290703 | -2.20884179 | -1.77330197 |
| C | -0.70627668 | -2.81486741 | 1.00475094  |
| C | -0.27258936 | -3.59012705 | 2.26272066  |
| C | 0.54274250  | -5.04761496 | 4.62770395  |
| C | 0.84573606  | -3.03309792 | 3.16309102  |
| C | -0.87507089 | -4.76254117 | 2.57740808  |
| C | -0.44138316 | -5.53780111 | 3.83537747  |
| C | 1.22737918  | -3.71532515 | 4.27010574  |
| H | 2.00859800  | -0.47227376 | -3.20403422 |
| H | 0.18327329  | 1.35017930  | 0.08651617  |
| H | -0.01679527 | -1.06190410 | 1.07003048  |
| H | 2.19986557  | 1.25499319  | -1.51701960 |
| H | 1.34428573  | -2.51955020 | -2.61516010 |
| H | -1.82011206 | -0.32268860 | -3.92334695 |

|   |             |             |             |
|---|-------------|-------------|-------------|
| H | 1.94422903  | -3.05829932 | 1.01016032  |
| H | 2.18933747  | -3.60010546 | -0.61322449 |
| H | -1.74076586 | -3.00453236 | 0.80787704  |
| H | -0.55970104 | -1.76689949 | 1.16342930  |
| H | 0.84406981  | -5.58626873 | 5.50174856  |
| H | 1.32142691  | -2.10741729 | 2.91462856  |
| H | -1.65208861 | -5.14956834 | 1.95182560  |
| H | -0.91707085 | -6.46348403 | 4.08383743  |
| H | 2.00439586  | -3.32829723 | 4.89568904  |

**Exo reactant**

0 1

|   |             |             |             |
|---|-------------|-------------|-------------|
| C | -1.17820105 | -1.23217408 | -4.05694251 |
| C | -0.77913379 | 0.04024213  | -3.28375272 |
| C | 1.52558979  | 1.28522061  | -1.01440636 |
| C | 1.66418979  | 2.81962061  | -2.65290636 |
| C | 1.63778979  | 2.74372061  | -1.31310636 |
| C | 1.62133379  | 1.40915787  | -3.17484728 |
| C | -0.87328979 | 0.09397939  | -1.75019364 |
| O | 2.34388979  | 0.75652061  | -2.09840636 |
| O | -1.03230463 | -2.19415155 | -3.32016370 |
| O | -1.56647570 | -1.40957828 | -5.33206227 |
| C | 1.70179355  | 0.48812966  | 0.50614496  |
| C | -0.77057348 | -1.20326561 | -1.01991228 |
| N | 0.62865641  | -1.21745628 | 0.42594412  |
| O | -1.56497348 | -2.09536561 | -1.27051228 |
| C | 0.75645641  | -2.26515628 | 1.41834412  |
| C | 0.17185641  | -1.85305628 | 2.74644412  |
| C | -0.93054359 | -1.05155628 | 5.19764412  |
| C | -1.21924359 | -1.78695628 | 2.91514412  |
| C | 1.00355641  | -1.50715628 | 3.82084412  |
| C | 0.45335641  | -1.11025628 | 5.04104412  |
| C | -1.76674359 | -1.38935628 | 4.13534412  |
| H | -1.37897919 | 0.79844458  | -4.19903091 |
| H | 1.68678979  | 3.71102061  | -3.26050636 |
| H | 1.62358979  | 3.56042061  | -0.60980636 |
| H | 2.10703379  | 1.24225787  | -4.13784728 |
| H | -1.68328979 | 0.71487939  | -1.35049364 |
| H | -1.68611518 | -2.37828911 | -5.42474739 |

|   |             |             |            |
|---|-------------|-------------|------------|
| H | 1.33919355  | 1.09142966  | 1.34384496 |
| H | 2.76039355  | 0.24252966  | 0.62884496 |
| H | 1.81955641  | -2.51355628 | 1.51434412 |
| H | 0.24705641  | -3.17025628 | 1.06714412 |
| H | -1.35784359 | -0.74415628 | 6.14844412 |
| H | -1.88114359 | -2.04755628 | 2.09044412 |
| H | 2.08525641  | -1.54625628 | 3.71514412 |
| H | 1.10445641  | -0.84755628 | 5.87094412 |
| H | -2.84594359 | -1.34465628 | 4.25574412 |

**Exo TS**

0 1

|   |             |             |             |
|---|-------------|-------------|-------------|
| C | 0.69460351  | 0.32751386  | 0.63243955  |
| C | 0.19369104  | -0.16994905 | 1.92314545  |
| C | 2.00411275  | -0.35500348 | 3.88841768  |
| C | 0.35042481  | 1.11917008  | 4.33629712  |
| C | 0.99998701  | 0.00468662  | 4.84987818  |
| C | 1.00321884  | 1.44586990  | 3.10649324  |
| C | 0.76698338  | -1.26131406 | 2.58543085  |
| O | 2.22609855  | 0.77985224  | 3.06041605  |
| O | 1.67834133  | 0.08632787  | -0.02368892 |
| O | -0.19666040 | 1.28641230  | 0.15545271  |
| C | 3.15945274  | -1.29719849 | 3.90256113  |
| C | 1.80561692  | -2.18884907 | 2.01127252  |
| N | 3.02418311  | -2.16419141 | 2.70275480  |
| O | 1.60959075  | -2.96978918 | 1.09897063  |
| C | 4.12668433  | -3.09374328 | 2.37085417  |
| C | 4.08568933  | -4.32318320 | 3.24882316  |
| C | 3.98792417  | -6.61371732 | 4.85476617  |
| C | 3.08465162  | -5.28463026 | 3.04158381  |
| C | 5.03519379  | -4.50936999 | 4.26163605  |
| C | 4.98502231  | -5.65596804 | 5.06118542  |
| C | 3.03787994  | -6.42611938 | 3.84414998  |
| H | -0.84655713 | 0.09895536  | 2.13926755  |
| H | -0.51538646 | 1.61749937  | 4.73341690  |
| H | 0.75669896  | -0.55142970 | 5.73651279  |
| H | 0.93519804  | 2.30373215  | 2.46534568  |
| H | 0.12463611  | -1.80077392 | 3.30096726  |
| H | 0.06778335  | 1.63276953  | -0.73512118 |

|   |            |             |            |
|---|------------|-------------|------------|
| H | 3.17601134 | -1.91670416 | 4.83059866 |
| H | 4.12699786 | -0.73900668 | 3.85320944 |
| H | 5.09907992 | -2.55980965 | 2.45007361 |
| H | 4.01704473 | -3.38875756 | 1.29286195 |
| H | 3.95159120 | -7.50581591 | 5.47684699 |
| H | 2.34605596 | -5.13194412 | 2.24921692 |
| H | 5.81647094 | -3.77079525 | 4.42574100 |
| H | 5.72637804 | -5.80276583 | 5.84459581 |
| H | 2.26225513 | -7.17289357 | 3.68050961 |

**Exo product**

0 1

|   |             |             |             |
|---|-------------|-------------|-------------|
| C | -1.41447282 | -0.57320259 | -2.99072490 |
| C | -0.47252564 | 0.50691805  | -2.42709831 |
| C | 1.35533894  | 0.42819564  | -0.99087127 |
| C | 1.47756984  | 2.02617597  | -2.52624057 |
| C | 1.70538188  | 1.88524403  | -1.22076937 |
| C | 0.97418548  | 0.63584588  | -3.00098750 |
| C | -0.10135286 | 0.16025758  | -0.97572353 |
| O | 1.78278102  | -0.25570216 | -2.22575231 |
| O | -1.39707297 | -1.73615905 | -2.51030834 |
| O | -2.30891061 | -0.25463031 | -4.06002034 |
| C | 1.84042425  | -0.25398406 | 0.27562569  |
| C | -0.03660817 | -1.33045956 | -0.59755066 |
| N | 1.28680151  | -1.61569116 | 0.04294328  |
| O | -0.94540323 | -2.17637293 | -0.80271564 |
| C | 1.20734103  | -2.43232988 | 1.26265113  |
| C | 0.32212308  | -1.71883951 | 2.30136219  |
| C | -1.34208676 | -0.37747714 | 4.25413858  |
| C | -1.19432562 | -1.98519628 | 2.33357074  |
| C | 0.87760615  | -0.85657403 | 3.18708440  |
| C | -0.00761188 | -0.14308328 | 4.22579515  |
| C | -1.97331746 | -1.35732455 | 3.24763630  |
| H | -0.93768854 | 1.45942077  | -2.57291339 |
| H | 1.58929662  | 2.91358394  | -3.11354307 |
| H | 2.02988756  | 2.61874709  | -0.51255378 |
| H | 1.03483534  | 0.51468220  | -4.06237383 |
| H | -0.73524303 | 0.64995376  | -0.26630061 |
| H | -1.87572888 | -0.42209728 | -4.90020389 |

|   |             |             |            |
|---|-------------|-------------|------------|
| H | 1.40592422  | 0.21602683  | 1.13306343 |
| H | 2.90273979  | -0.25737893 | 0.40358727 |
| H | 2.18938747  | -2.56923580 | 1.66482219 |
| H | 0.78251005  | -3.38558488 | 1.02659278 |
| H | -1.95714084 | 0.11825993  | 4.97584021 |
| H | -1.63290750 | -2.66600193 | 1.63424991 |
| H | 1.93124287  | -0.67150940 | 3.16470697 |
| H | 0.43097017  | 0.53772147  | 4.92511673 |
| H | -3.02695344 | -1.54239302 | 3.27001700 |
